# Supplementary material for: Synthesis of oligonucleotides containing N,N-disubstituted 3-deazacytosine nucleobases by post-elongation modification and their triplex-forming ability with double-stranded DNA
Source: Royal Society of Chemistry journal article supplement (doi:10.1039/c4ob01760a), 2014-01-01

## Electronic Supplementary Information

### **Synthesis of oligonucleotides containing *N,N*-disubstituted 3-deazacytosine nucleobases by post-elongation modification and their triplex-forming ability with double-stranded DNA**

Masaaki Akabane-Nakata, Satoshi Obika,\* Yoshiyuki Hari\*

*\*Graduate School of Pharmaceutical Sciences, Osaka University, 1-6 Yamadaoka, Suita, Osaka, 565-0871, Japan.*

## Contents

|                                                                                     |              |
|-------------------------------------------------------------------------------------|--------------|
| 1. Synthesis of new secondary amines                                                | Page S1–S6   |
| 2. Representative HPLC charts of crude TFOs before HPLC purification                | Page S7      |
| 3. Representative UV-melting curves of triplexes                                    | Page S7      |
| 4. $^1\text{H}$ , $^{13}\text{C}$ and $^{31}\text{P}$ spectra for the new compounds | Page S8–S24  |
| 5. HPLC charts and MALDI-TOF-Mass spectra for TFOs                                  | Page S25–S35 |

**General:** Melting points are uncorrected. All moisture-sensitive reactions were carried out in well-dried glassware under a N<sub>2</sub> atmosphere. <sup>1</sup>H NMR (400 MHz) and <sup>13</sup>C NMR (101 MHz) were recorded on JEOL JNM-ECS-400 spectrometers. Chemical shifts are reported in parts per million downfield from an internal standard [tetramethylsilane (0.00 ppm) for <sup>1</sup>H NMR, or CD<sub>3</sub>OD (49.00 ppm) or CDCl<sub>3</sub> (77.00 ppm) for <sup>13</sup>C NMR]. IR spectra were recorded on a JASCO FT/IR-4200 spectrometers. Optical rotations were recorded on a JASCO P-2200 instrument. Mass spectra were measured on a JEOL JMS-700 mass spectrometer. For silica gel flash column chromatography, Fuji Silysia PSQ-100B, FL-100D was used. For amine silica gel column chromatography, Fuji Silysia DM-1020 was used.

**Synthesis of secondary amines:** All new secondary amines **S1-S4** used in this study were synthesized in Scheme S1.

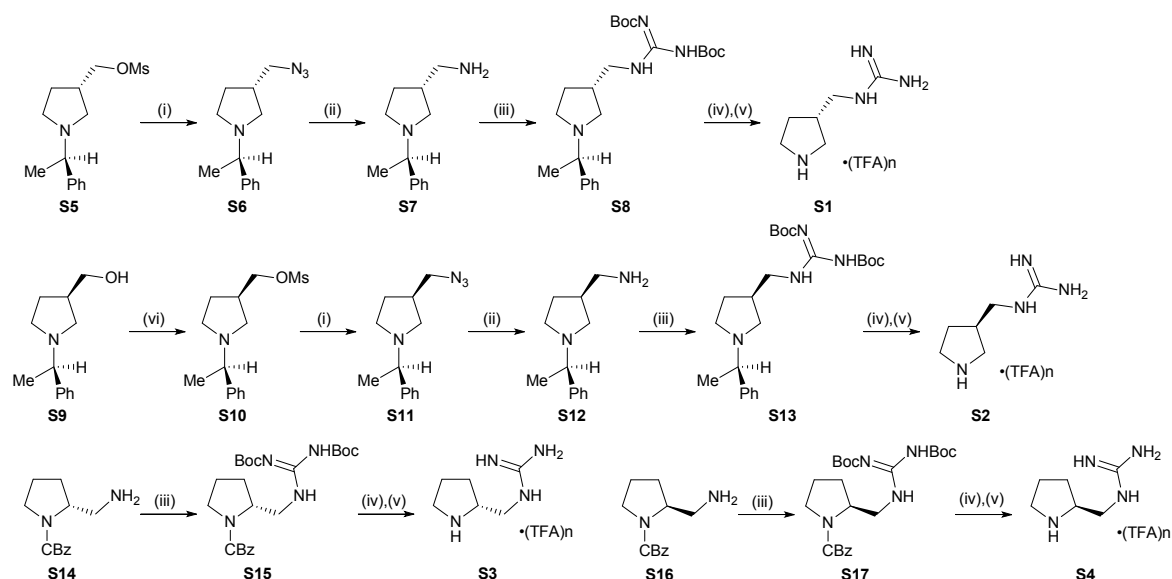

**Scheme S1.** Synthesis of guanidinomethylpyrrolidines. *Reagents and conditions:* (i) NaN<sub>3</sub>, DMF, 60 °C, 10 h, 88% (**S6**), 95% (**S11**); (ii) *n*-Bu<sub>3</sub>P, THF–H<sub>2</sub>O, room temperature, 10 h, quant. (**S7**), quant. (**S12**); (iii) (BocNH)<sub>2</sub>CS, DIPEA, EDCI·HCl, CH<sub>2</sub>Cl<sub>2</sub>, room temperature, 5–13 h, 71% (**S8**), 66% (**S13**), 64% (**S15**), 89% (**S17**); (iv) TFA, CH<sub>2</sub>Cl<sub>2</sub>, room temperature, 2–10 h; (v) H<sub>2</sub>, 20% Pd(OH)<sub>2</sub>-C, MeOH, room temperature, 10–13 h, 97% (**S1**), 79% (**S2**), 75% (**S3**), 87% (**S4**); (vi) MsCl, Et<sub>3</sub>N, DMAP, CH<sub>2</sub>Cl<sub>2</sub>, room temperature, 3 h, quant..

**(3*S*)-3-Azidomethyl-1-[(*R*)-1-phenylethyl]pyrrolidine (**S6**):** Under a N<sub>2</sub> atmosphere, NaN<sub>3</sub> (459 mg, 7.06 mmol) was added to a solution of compound **S5**<sup>1</sup> (1.0 g, 3.53 mmol) in anhydrous DMF (50 mL) and the resulting mixture was stirred at 60 °C for 10 h. After addition of saturated aqueous NaHCO<sub>3</sub> solution, the reaction mixture was extracted with Et<sub>2</sub>O. The organic extracts were washed with water and brine, dried over Na<sub>2</sub>SO<sub>4</sub>, and concentrated *in vacuo*. The residue was purified by silica gel flash column chromatography (*n*-hexane/AcOEt = 5/1) to give compound **S6** (715 mg, 88%) as a yellow syrup.

[α]<sub>D</sub><sup>28</sup> +38.3 (*c* 1.0, CHCl<sub>3</sub>). IR ν<sub>max</sub> (KBr) 3061, 3028, 2971, 2930, 2872, 2784, 2095, 1492, 1452, 1368, 1280, 1150 cm<sup>-1</sup>. <sup>1</sup>H NMR (CDCl<sub>3</sub>) δ 1.36 (3H, d, *J* = 6.4 Hz), 1.41–1.53 (1H, m), 1.95–2.04

(1H, m), 2.26 (1H, dd,  $J = 6.4$  and  $13.2$  Hz), 2.32–2.43 (2H, m), 2.55–2.67 (2H, m), 3.17 (2H, q,  $J = 6.4$  Hz), 3.25 (2H, d,  $J = 7.3$  Hz), 7.20–7.33 (5H, m).  $^{13}\text{C}$  NMR ( $\text{CDCl}_3$ )  $\delta$  23.02, 28.12, 37.15, 52.23, 55.64, 56.52, 65.47, 126.85, 127.04, 128.24, 145.39. MS (FAB)  $m/z$  231 ( $\text{M}+\text{H}^+$ ). HRMS (FAB): Calcd for  $\text{C}_{13}\text{H}_{19}\text{N}_4$  ( $\text{M}+\text{H}^+$ ), 231.1604; found, 231.1610.

**(3R)-3-Aminomethyl-1-[(R)-1-phenylethyl]pyrrolidine (S7):** *n*-Bu<sub>3</sub>P (1.52 mL, 6.08 mmol) was added to a solution of compound **S6** (700 mg, 3.04 mmol) in THF (30 mL) and H<sub>2</sub>O (6 mL), and the resulting mixture was stirred at room temperature for 10 h. After the reaction mixture was concentrated *in vacuo*, the residue was purified by amine silica gel column chromatography ( $\text{CH}_2\text{Cl}_2/\text{MeOH} = 100/1$  to  $20/1$ ) to give compound **S7** (639 mg, quant.) as a yellow syrup.

$[\alpha]_{\text{D}}^{25} +53.2$  ( $c$  1.0,  $\text{CHCl}_3$ ). IR  $\nu_{\text{max}}$  (KBr) 3335, 2969, 2785, 2596, 2158, 1750, 1491, 1452, 1372, 1309, 1219, 1148  $\text{cm}^{-1}$ .  $^1\text{H}$  NMR ( $\text{CDCl}_3$ )  $\delta$  1.08 (2H, brs), 1.37 (3H, d,  $J = 6.4$  Hz), 1.38–1.46 (1H, m), 1.95–2.04 (1H, m), 1.93–2.03 (1H, m), 2.08–2.22 (2H, m), 2.34 (1H, ddd,  $J = 6.4, 8.3$  and  $13.6$  Hz), 2.59–2.69 (3H, m), 2.75 (1H, ddd,  $J = 6.4, 8.3$  and  $13.6$  Hz), 3.16 (2H, q,  $J = 6.4$  Hz), 7.19–7.33 (5H, m).  $^{13}\text{C}$  NMR ( $\text{CDCl}_3$ )  $\delta$  23.09, 28.28, 40.84, 47.03, 52.50, 57.35, 65.86, 126.73, 127.09, 128.18, 145.60. MS (FAB)  $m/z$  205 ( $\text{M}+\text{H}^+$ ). HRMS (FAB): Calcd for  $\text{C}_{13}\text{H}_{21}\text{N}_2$  ( $\text{M}+\text{H}^+$ ), 205.1699; found, 205.1709.

**(3R)-3-[N,N'-bis(tert-butoxycarbonyl)guanidinomethyl]-1-[(R)-1-phenylethyl]pyrrolidine (S8):** Under a N<sub>2</sub> atmosphere, EDCI·HCl (141 mg, 0.734 mmol) was added to a solution of compound **S7** (100 mg, 0.489 mmol), (BocNH)<sub>2</sub>CS<sup>2</sup>) (135 mg, 0.489 mmol), and DIPEA (0.256 mL, 1.47 mmol) in anhydrous  $\text{CH}_2\text{Cl}_2$  (10 mL); the resulting mixture was stirred at room temperature for 8 h. After addition of saturated aqueous NaHCO<sub>3</sub> solution, the reaction mixture was extracted with  $\text{CH}_2\text{Cl}_2$ . The organic extracts were washed with water and brine, dried over Na<sub>2</sub>SO<sub>4</sub>, and concentrated *in vacuo*. The residue was purified by silica gel flash column chromatography (*n*-hexane/AcOEt = 1/1) to give compound **S8** (155 mg, 71%) as a colorless syrup.

$[\alpha]_{\text{D}}^{30} +10.3$  ( $c$  1.0,  $\text{CHCl}_3$ ). IR  $\nu_{\text{max}}$  (KBr) 3330, 3280, 3129, 2975, 2931, 2876, 2783, 1795, 1722, 1639, 1415, 1366, 1318, 1133, 1056, 1027  $\text{cm}^{-1}$ .  $^1\text{H}$  NMR ( $\text{CDCl}_3$ )  $\delta$  1.37 (3H, d,  $J = 6.4$  Hz), 1.50 (18H, s), 1.92–2.01 (1H, m), 2.37–2.53 (5H, m), 3.15 (1H, q,  $J = 6.4$  Hz), 3.37 (1H, ddd,  $J = 7.0, 7.0$  and  $13.3$  Hz), 3.47 (1H, ddd,  $J = 7.0, 7.0$  and  $13.3$  Hz), 7.20–7.38 (5H, m), 8.51 (1H, s), 11.5 (1H, s).  $^{13}\text{C}$  NMR ( $\text{CDCl}_3$ )  $\delta$  23.42, 28.26, 28.35, 28.42, 28.58, 36.31, 46.13, 52.98, 56.99, 65.93, 79.45, 83.14, 127.05, 127.51, 128.48, 145.91, 149.00, 153.34, 156.73, 163.92. MS (FAB)  $m/z$  447 ( $\text{M}+\text{H}^+$ ). HRMS (FAB): Calcd for  $\text{C}_{24}\text{H}_{39}\text{N}_4\text{O}_4$  ( $\text{M}+\text{H}^+$ ), 447.2966; found, 447.2970.

**(3R)-3-Guanidinomethylpyrrolidine, TFA salt (S1):** TFA (5 mL) was added to a solution of **S8** (1.0 g, 2.42 mmol) in  $\text{CH}_2\text{Cl}_2$  (5 mL) and the resulting mixture was stirred at room temperature for 10 h. After the reaction mixture was concentrated *in vacuo*, the crude product was dissolved in MeOH (5 mL). Under a H<sub>2</sub> atmosphere, the solution was added to a solution of 20% Pd(OH)<sub>2</sub>-C (1.0 g) in MeOH (5 mL) and the resulting mixture was stirred at room temperature for 10 h. After the reaction

mixture was filtered, the filtrate was concentrated *in vacuo*. The residue was purified by amine silica gel column chromatography ( $\text{CHCl}_3/\text{MeOH} = 1/1$ ) to give compound **S1** (600 mg, 97%) as a yellow syrup.

$[\alpha]_{\text{D}}^{24} -6.22$  ( $c$  1.0, MeOH). IR  $\nu_{\text{max}}$  (KBr) 3141, 2152, 1679, 1511, 1436, 1202, 1139  $\text{cm}^{-1}$ .  $^1\text{H}$  NMR ( $\text{CD}_3\text{OD}$ )  $\delta$  1.44 (1H, dddd,  $J = 5.0, 6.9, 6.9$  and  $14.7$  Hz), 1.98 (1H, dddd,  $J = 5.0, 6.9, 6.9$  and  $14.7$  Hz), 2.37 (1H, ddd,  $J = 6.9, 6.9$  and  $14.7$  Hz), 2.55 (1H, dd,  $J = 7.3$  and  $11.4$  Hz), 2.82–2.97 (2H, m), 3.02 (1H, dd,  $J = 7.3$  and  $11.4$  Hz), 3.15 (2H, d,  $J = 7.3$  Hz).  $^{13}\text{C}$  NMR ( $\text{CD}_3\text{OD}$ )  $\delta$  30.85, 39.89, 45.78, 46.92, 50.93, 118.16 (q,  $J = 293$  Hz), 158.84, 163.21 (q,  $J = 34.5$  Hz). MS (FAB)  $m/z$  143 ( $\text{M}+\text{H}^+$ ). HRMS (FAB): Calcd for  $\text{C}_6\text{H}_{15}\text{N}_4$  ( $\text{M}+\text{H}^+$ ), 143.1291; found, 143.1299.

**(3R)-3-Methanesulfonyloxymethyl-1-[(R)-1-phenylethyl]pyrrolidine (S10):** Under a  $\text{N}_2$  atmosphere,  $\text{MsCl}$  (0.566 mL, 7.31 mmol) was added to a solution of compound **S9**<sup>3)</sup> (1.0 g, 4.87 mmol), DMAP (59.5 mg, 0.487 mmol), and  $\text{Et}_3\text{N}$  (2.04 mL, 14.6 mmol) in anhydrous  $\text{CH}_2\text{Cl}_2$  (40 mL) at  $0^\circ\text{C}$ ; the resulting mixture was stirred at room temperature for 3 h. After addition of saturated aqueous  $\text{NaHCO}_3$  solution, the reaction mixture was extracted with  $\text{AcOEt}$ . The organic extracts were washed with water and brine, dried over  $\text{Na}_2\text{SO}_4$ , and concentrated *in vacuo*. The residue was purified by silica gel flash column chromatography ( $n$ -hexane/ $\text{AcOEt} = 1/1$ ) to give compound **S10** (1.43 mg, quant.) as a yellow syrup.

$[\alpha]_{\text{D}}^{25} +40.9$  ( $c$  1.0,  $\text{CHCl}_3$ ). IR  $\nu_{\text{max}}$  (KBr) 3616, 3027, 2971, 2936, 2876, 2789, 1492, 1453, 1415, 1355, 1283, 1174  $\text{cm}^{-1}$ .  $^1\text{H}$  NMR ( $\text{CDCl}_3$ )  $\delta$  1.37 (3H, d,  $J = 6.4$  Hz), 1.46–1.54 (1H, m), 1.93–2.02 (1H, m), 2.28 (1H, dd,  $J = 4.5$  and  $9.0$  Hz), 2.36 (1H, ddd,  $J = 8.7, 8.7$  and  $8.7$  Hz), 2.51–2.63 (2H, m), 2.71 (1H, ddd,  $J = 5.0, 8.7$  and  $8.7$  Hz), 2.94 (3H, s), 3.20 (1 H, q,  $J = 6.4$  Hz), 4.07–4.14 (2H, m), 7.20–7.30 (5H, m).  $^{13}\text{C}$  NMR ( $\text{CDCl}_3$ )  $\delta$  23.06, 26.74, 36.50, 37.15, 51.84, 55.35, 65.19, 72.66, 126.92, 126.97, 145.29. MS (FAB)  $m/z$  284 ( $\text{M}+\text{H}^+$ ). HRMS (FAB): Calcd for  $\text{C}_{14}\text{H}_{22}\text{NO}_3\text{S}$  ( $\text{M}+\text{H}^+$ ), 284.1315; found, 284.1317.

**(3R)-3-Azidomethyl-1-[(R)-1-phenylethyl]pyrrolidine (S11):** Under a  $\text{N}_2$  atmosphere,  $\text{NaN}_3$  (642 mg, 9.88 mmol) was added to a solution of compound **S10** (1.4 g, 4.94 mmol) in anhydrous DMF (30 mL) and the resulting mixture was stirred at  $60^\circ\text{C}$  for 10 h. After addition of saturated aqueous  $\text{NaHCO}_3$  solution, the reaction mixture was extracted with  $\text{Et}_2\text{O}$ . The organic extracts were washed with water and brine, dried over  $\text{Na}_2\text{SO}_4$ , and concentrated *in vacuo*. The residue was purified by silica gel flash column chromatography ( $n$ -hexane/ $\text{AcOEt} = 2/1$ ) to give compound **S11** (1.08 g, 95%) as a yellow syrup.

$[\alpha]_{\text{D}}^{21} +59.3$  ( $c$  1.0,  $\text{CHCl}_3$ ). IR  $\nu_{\text{max}}$  (KBr) 3061, 3027, 2970, 2931, 2872, 2785, 2095, 1491, 1451, 1367, 1280, 1151  $\text{cm}^{-1}$ .  $^1\text{H}$  NMR ( $\text{CDCl}_3$ )  $\delta$  1.35 (3H, d,  $J = 6.4$  Hz), 1.41–1.49 (1H, m), 1.90–1.99 (1H, m), 2.18 (1H, dd,  $J = 5.5$  and  $9.6$  Hz), 2.59 (1H, ddd,  $5.5, 9.2$  and  $9.2$  Hz), 2.68 (1H, dd,  $7.8$  and  $9.6$  Hz), 3.14–3.25 (3H, m), 7.18–7.31 (5H, m).  $^{13}\text{C}$  NMR ( $\text{CDCl}_3$ )  $\delta$  23.08, 28.07, 36.95, 52.08, 55.67, 56.44, 65.33, 126.71, 126.85, 128.16, 145.32. MS (FAB)  $m/z$  231 ( $\text{M}+\text{H}^+$ ). HRMS (FAB): Calcd for  $\text{C}_{13}\text{H}_{19}\text{N}_4$  ( $\text{M}+\text{H}^+$ ), 231.1604; found, 231.1609.

**(3S)-3-Aminomethyl-1-[(R)-1-phenylethyl]pyrrolidine (S12):** *n*-Bu<sub>3</sub>P (2.17 mL, 8.68 mmol) was added to a solution of compound **S11** (1.0 g, 4.34 mmol) in THF (60 mL) and H<sub>2</sub>O (12 mL), and the resulting mixture was stirred at room temperature for 10 h. After the reaction mixture was concentrated *in vacuo*, the residue was purified by amine silica gel column chromatography (CH<sub>2</sub>Cl<sub>2</sub>/MeOH = 50/1) to give compound **S12** (887 mg, quant.) as a yellow syrup.

$[\alpha]_D^{23} +54.1$  (*c* 1.0, CHCl<sub>3</sub>). IR  $\nu_{\max}$  (KBr) 3277, 2970, 2783, 2602, 2151, 1570, 1490, 1453, 1373, 1310, 1220, 1147 cm<sup>-1</sup>. <sup>1</sup>H NMR (CDCl<sub>3</sub>)  $\delta$  1.09 (1H, brs), 1.37 (3H, d, *J* = 6.4 Hz), 1.38–1.46 (1H, m), 1.88–1.97 (1H, m), 2.11 (1H, dd, *J* = 6.0 and 8.7 Hz), 2.14–2.25 (1H, m), 2.41 (1H, ddd, *J* = 6.0, 8.7 and 8.7 Hz), 2.52 (1H, ddd, *J* = 6.0, 8.7 and 8.7 Hz), 2.64 (1H, dd, *J* = 1.9 and 6.8 Hz), 2.64 (1H, dd, *J* = 1.9 and 6.8 Hz), 2.79 (1H, dd, *J* = 7.8 and 8.7 Hz), 3.16 (2H, q, *J* = 6.4 Hz), 7.19–7.33 (5H, m). <sup>13</sup>C NMR (CDCl<sub>3</sub>)  $\delta$  23.44, 28.59, 40.91, 47.42, 52.83, 57.44, 66.07, 126.95, 127.26, 128.44, 145.92. MS (FAB) *m/z* 205 (M+H<sup>+</sup>). HRMS (FAB): Calcd for C<sub>13</sub>H<sub>21</sub>N<sub>2</sub> (M+H<sup>+</sup>), 205.1699; found, 205.1707.

**(3S)-3-[N,N'-bis(tert-butoxycarbonyl)guanidinomethyl]-1-[(R)-1-phenylethyl]pyrrolidine (S13):** Under a N<sub>2</sub> atmosphere, EDCI•HCl (3.66 g, 19.1 mmol) was added to a solution of compound **S12** (3.0 g, 14.7 mmol), (BocNH)<sub>2</sub>CS (4.06 g, 14.7 mmol), and DIPEA (7.67 mL, 44.0 mmol) in anhydrous CH<sub>2</sub>Cl<sub>2</sub> (30 mL); the resulting mixture was stirred at room temperature for 5 h. After addition of saturated aqueous NaHCO<sub>3</sub> solution, the reaction mixture was extracted with CH<sub>2</sub>Cl<sub>2</sub>. The organic extracts were washed with water and brine, dried over Na<sub>2</sub>SO<sub>4</sub>, and concentrated *in vacuo*. The residue was purified by silica gel flash column chromatography (*n*-hexane/AcOEt = 5/1 to 2/1) to give compound **S13** (4.02 g, 66%) as a colorless syrup.

$[\alpha]_D^{31} -13.7$  (*c* 1.0, CHCl<sub>3</sub>). IR  $\nu_{\max}$  (KBr) 3330, 3288, 3128, 2975, 2932, 2877, 2785, 1795, 1722, 1639, 1415, 1366, 1314, 1134, 1055, 1027 cm<sup>-1</sup>. <sup>1</sup>H NMR (CDCl<sub>3</sub>)  $\delta$  1.38 (3H, d, *J* = 6.4 Hz), 1.44–1.58 (19 H, m), 1.98 (1H, dddd, *J* = 5.0, 5.0, 9.6 and 19.2 Hz), 2.22 (1H, dd, *J* = 5.0 and 9.6 Hz), 2.31–2.50 (2H, m), 2.61 (1H, dd, *J* = 7.8 and 9.2 Hz), 2.75 (1H, ddd, *J* = 5.0, 5.0 and 9.6 Hz), 3.16 (1H, q, *J* = 6.4 Hz), 3.32 (1H, ddd, *J* = 5.0, 6.0 and 13.4 Hz), 3.46 (1H, ddd, *J* = 6.0, 6.0 and 13.4 Hz), 7.19–7.38 (5H, m), 8.62 (1H, s), 11.5 (1H, s). <sup>13</sup>C NMR (CDCl<sub>3</sub>)  $\delta$  23.05, 27.89, 27.97, 28.20, 35.90, 45.95, 52.16, 57.06, 65.66, 79.03, 82.67, 126.68, 128.16, 145.57, 152.91, 156.25, 163.54. MS (FAB) *m/z* 447 (M+H<sup>+</sup>). HRMS (FAB): Calcd for C<sub>24</sub>H<sub>39</sub>N<sub>4</sub>O<sub>4</sub> (M+H<sup>+</sup>), 447.2966; found, 447.2972.

**(3S)-3-Guanidinomethylpyrrolidine, TFA salt (S2):** TFA (5 mL) was added to a solution of compound **S13** (800 mg, 1.93 mmol) in CH<sub>2</sub>Cl<sub>2</sub> (5 mL) and the resulting mixture was stirred at room temperature for 3 h. After the reaction mixture was concentrated *in vacuo*, the crude product was dissolved in MeOH (5 mL). Under a H<sub>2</sub> atmosphere, the solution was added to a solution of 20% Pd(OH)<sub>2</sub>-C (1.0 g) in MeOH (5 mL) and the resulting mixture was stirred at room temperature for 10 h. After the reaction mixture was filtered, the filtrate was concentrated *in vacuo*. The residue was purified by amine silica gel column chromatography (CHCl<sub>3</sub>/MeOH = 1/1 to 1/5) to give compound

**S2** (390 mg, 79%) as a yellow syrup.

$[\alpha]_D^{24} +6.63$  (*c* 1.0, MeOH). IR  $\nu_{\max}$  (KBr) 3158, 2494, 1681, 1511, 1430, 1201, 1136  $\text{cm}^{-1}$ .  $^1\text{H}$  NMR ( $\text{CD}_3\text{OD}$ )  $\delta$  1.40–1.49 (1H, m), 1.94–2.02 (1H, m), 2.36 (1H, ddd, *J* = 7.8, 7.8 and 14.8 Hz), 2.54 (1H, dd, *J* = 6.0 and 7.8 Hz), 2.83–2.97 (2H, m), 3.02 (1H, dd, *J* = 7.8 and 7.8 Hz), 3.15 (2H, d, *J* = 7.8 Hz).  $^{13}\text{C}$  NMR ( $\text{CD}_3\text{OD}$ )  $\delta$  30.88, 39.93, 45.77, 46.95, 50.96, 118.16 (q, *J* = 293 Hz), 158.86, 163.21 (q, *J* = 34.5 Hz). MS (FAB) *m/z* 143 ( $\text{M}+\text{H}^+$ ). HRMS (FAB): Calcd for  $\text{C}_6\text{H}_{15}\text{N}_4$  ( $\text{M}+\text{H}^+$ ), 143.1291; found, 143.1298.

**(2R)-1-Benzoyloxycarbonyl-2-[N,N'-bis(tert-butoxycarbonyl)guanidinomethyl]pyrrolidine (S15):**

Under a  $\text{N}_2$  atmosphere, EDCI·HCl (1.06 g, 5.55 mmol) was added to a solution of commercially available compound **14** (1.0 g, 4.27 mmol),  $(\text{BocNH})_2\text{CS}$  (1.18 g, 4.27 mmol), and DIPEA (2.23 mL, 12.8 mmol) in anhydrous  $\text{CH}_2\text{Cl}_2$  (30 mL); the resulting mixture was stirred at room temperature for 5 h. After addition of saturated aqueous  $\text{NaHCO}_3$  solution, the reaction mixture was extracted with  $\text{CH}_2\text{Cl}_2$ , washed with water and brine, dried over  $\text{Na}_2\text{SO}_4$ , and concentrated *in vacuo*. The residue was purified by silica gel flash column chromatography (*n*-hexane/AcOEt = 5/1 to 3/1) to give compound **S15** (1.30 g, 64%) as a yellow syrup.

$[\alpha]_D^{27} +37.4$  (*c* 0.5,  $\text{CHCl}_3$ ). IR  $\nu_{\max}$  (KBr) 3327, 3287, 3136, 2936, 2887, 1706, 1639, 1575, 1450, 1413, 1369, 1329, 1137, 1056  $\text{cm}^{-1}$ .  $^1\text{H}$  NMR ( $\text{CDCl}_3$ , as a mixture of atropisomers)  $\delta$  1.47 (6H, s), 1.50 (12H, s), 1.78–2.04 (4H, m), 3.40–3.70 (4H, m), 4.07–4.12 (1H, m), 5.08–5.30 (2H, m), 7.28–7.38 (5H, m), 8.51 (0.5H, s), 8.59 (0.5H, s), 11.49 (1H, s).  $^{13}\text{C}$  NMR ( $\text{CDCl}_3$ , as a mixture of atropisomers)  $\delta$  22.98, 23.81, 27.94, 28.21, 28.70, 29.47, 43.70, 44.15, 46.61, 46.88, 56.11, 56.96, 66.68, 66.77, 79.01, 79.09, 82.78, 82.97, 127.70, 127.78, 127.86, 128.33, 136.79, 152.87, 152.99, 154.98, 155.30, 156.43, 156.51, 163.50. MS (FAB) *m/z* 477 ( $\text{M}+\text{H}^+$ ). HRMS (FAB): Calcd for  $\text{C}_{24}\text{H}_{37}\text{N}_4\text{O}_7$  ( $\text{M}+\text{H}^+$ ), 477.2708; found, 477.2717.

**(2R)-2-Guanidinomethylpyrrolidine, TFA salt (S3):** TFA (2 mL) was added to a solution of compound **S15** (1.3 g, 2.73 mmol) in  $\text{CH}_2\text{Cl}_2$  (2 mL) and the resulting mixture was stirred at room temperature for 3 h. After the reaction mixture was concentrated *in vacuo*, the crude product was dissolved in MeOH (5 mL). Under a  $\text{H}_2$  atmosphere, the solution was added to a solution of 20%  $\text{Pd}(\text{OH})_2\text{-C}$  (1.0 g) in MeOH (5 mL) and the resulting mixture was stirred at room temperature for 10 h. After the reaction mixture was filtered, the filtrate was concentrated *in vacuo*. The residue was purified by amine silica gel column chromatography ( $\text{CHCl}_3/\text{MeOH}$  = 2/1 to 1/5) to give compound **S3** (526 mg, 75%) as a yellow syrup.

$[\alpha]_D^{24} -0.34$  (*c* 1.0, MeOH). IR  $\nu_{\max}$  (KBr) 3143, 1676, 1523, 1420, 1200, 1137  $\text{cm}^{-1}$ .  $^1\text{H}$  NMR ( $\text{CD}_3\text{OD}$ )  $\delta$  1.43 (1H, dddd, *J* = 5.0, 6.8, 6.8 and 13.6 Hz), 1.67–1.84 (2H, m), 1.91–2.00 (1H, m), 2.84 (1H, ddd, *J* = 6.8, 6.8 and 13.6 Hz), 2.93 (1H, ddd, *J* = 5.0, 6.8 and 13.6 Hz), 3.12 (1H, dd, *J* = 6.8 and 13.6 Hz), 3.20 (1H, dd, *J* = 5.0 and 13.6 Hz).  $^{13}\text{C}$  NMR ( $\text{CD}_3\text{OD}$ )  $\delta$  26.74, 29.93, 47.06, 47.72, 58.83, 118.19 (q, *J* = 292 Hz), 159.71, 163.18 (q, *J* = 34.5 Hz). MS (FAB) *m/z* 143 ( $\text{M}+\text{H}^+$ ). HRMS (FAB): Calcd for  $\text{C}_6\text{H}_{15}\text{N}_4$  ( $\text{M}+\text{H}^+$ ), 143.1291; found, 143.1288.

**(2S)-1-Benzylloxycarbonyl-2-[N,N'-bis(*tert*-butoxycarbonyl)guanidinomethyl]pyrrolidine (S17):**

Under a N<sub>2</sub> atmosphere, EDCI•HCl (1.23 g, 6.41 mmol) was added to a solution of commercially available compound **S16** (1.0 g, 4.27 mmol), (BocNH)<sub>2</sub>CS (1.18 g, 4.27 mmol), and DIPEA (2.23 mL, 12.8 mmol) in anhydrous CH<sub>2</sub>Cl<sub>2</sub> (30 mL); the resulting mixture was stirred at room temperature for 13 h. After addition of saturated aqueous NaHCO<sub>3</sub> solution, the reaction mixture was extracted with CH<sub>2</sub>Cl<sub>2</sub>. The organic extracts were washed with water and brine, dried over Na<sub>2</sub>SO<sub>4</sub>, and concentrated *in vacuo*. The residue was purified by silica gel flash column chromatography (*n*-hexane/AcOEt = 10/1 to 5/1) to give compound **S17** (1.81 g, 89%) as a yellow syrup.

[ $\alpha$ ]<sub>D</sub><sup>31</sup> -39.4 (*c* 1.0, CHCl<sub>3</sub>). IR  $\nu_{\max}$  (KBr) 3328, 3288, 3127, 2935, 2887, 1707, 1639, 1576, 1447, 1412, 1367, 1327, 1138, 1056 cm<sup>-1</sup>. <sup>1</sup>H NMR (CDCl<sub>3</sub>, as a mixture of atropisomers)  $\delta$  1.47 (6H, s), 1.50 (12H, s), 1.77-2.04 (4H, m), 3.40-3.71 (4H, m), 4.07-4.12 (1H, m), 5.08-5.30 (2H, m), 7.28-7.38 (5H, m), 8.51 (0.5H, s), 8.59 (0.5H, s), 11.49 (1H, s). <sup>13</sup>C NMR (CDCl<sub>3</sub>, as a mixture of atropisomers)  $\delta$  22.75, 23.58, 27.71, 27.98, 28.47, 29.24, 43.49, 43.92, 46.37, 46.64, 55.84, 56.71, 66.43, 66.51, 78.71, 78.79, 82.49, 82.68, 127.45, 127.55, 127.60, 128.11, 136.55, 152.62, 152.73, 154.70, 155.05, 156.20, 156.27, 163.27. MS (FAB) *m/z* 477 (M+H<sup>+</sup>). HRMS (FAB): Calcd for C<sub>24</sub>H<sub>37</sub>N<sub>4</sub>O<sub>7</sub> (M+H<sup>+</sup>), 477.2708; found, 477.2707.

**(2S)-2-Guanidinomethylpyrrolidine, TFA salt (S4):** TFA (5 mL) was added to a solution of compound **S17** (900 mg, 1.89 mmol) in CH<sub>2</sub>Cl<sub>2</sub> (5 mL) and the resulting mixture was stirred at room temperature for 2 h. After the reaction mixture was concentrated *in vacuo*, the crude product was dissolved in MeOH (5 mL). Under a H<sub>2</sub> atmosphere, the solution was added to a solution of 20% Pd(OH)<sub>2</sub>-C (1.0 g) in MeOH (5 mL) and the resulting mixture was stirred at room temperature for 13 h. After the reaction mixture was filtered, the filtrate was concentrated *in vacuo*. The residue was purified by amine silica gel column chromatography (CHCl<sub>3</sub>/MeOH = 1/1) to give compound **S4** (421 mg, 87%) as a yellow syrup.

[ $\alpha$ ]<sub>D</sub><sup>25</sup> +1.12 (*c* 1.0, MeOH). IR  $\nu_{\max}$  (KBr) 3143, 1680, 1517, 1426, 1202, 1137 cm<sup>-1</sup>. <sup>1</sup>H NMR (CD<sub>3</sub>OD)  $\delta$  1.34 (1H, dddd, *J* = 5.0, 6.8, 6.8 and 13.6 Hz), 1.59-1.77 (2H, m), 1.81-1.90 (1H, m), 2.74 (1H, ddd, *J* = 6.8, 6.8 and 13.6 Hz), 2.81 (1H, ddd, *J* = 5.0, 6.8 and 13.6 Hz), 3.03 (1H, dd, *J* = 6.8 and 13.6 Hz), 3.10 (1H, dd, *J* = 5.0 and 13.6 Hz). <sup>13</sup>C NMR (CD<sub>3</sub>OD)  $\delta$  26.75, 29.93, 47.06, 47.73, 58.85, 119.06 (q, *J* = 292 Hz), 159.73, 163.19 (q, *J* = 34.5 Hz). MS (FAB) *m/z* 143 (M+H<sup>+</sup>). HRMS (FAB): Calcd for C<sub>6</sub>H<sub>15</sub>N<sub>4</sub> (M+H<sup>+</sup>), 143.1291; found, 143.1298.

References

- (1) C. Fava, R. Galeazzi, G. Mobbili, M. Orena, *Heterocycles*, **1999**, 51, 2463.
- (2) S. Robinson, E. J. Roskamp, *Tetrahedron*, **1997**, 53, 6697; B. R. Linton, A. J. Carr, B. P. Orner, A. D. Hamilton, *J. Org. Chem.*, **2000**, 65, 1566.
- (3) L. Nielsen, L. Brehm, P. Krogsgaard-Larsen, *J. Med. Chem.*, **1992**, 33, 71.

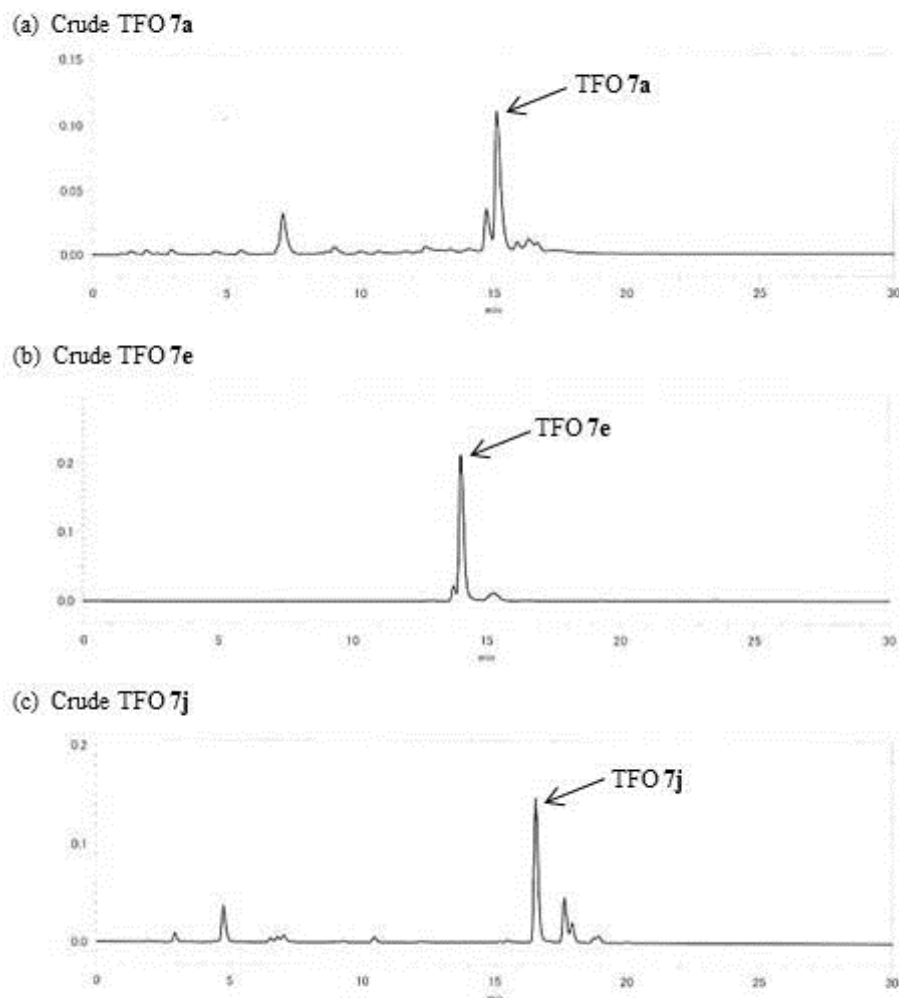

**Fig. S1.** Representative HPLC charts of crude TFOs before HPLC purification.

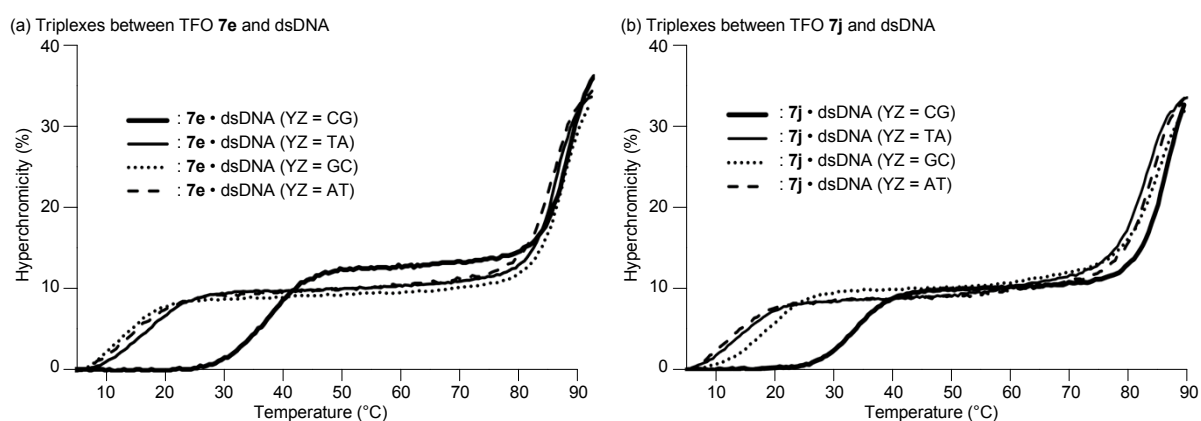

**Fig. S2.** Representative UV-melting curves of triplexes. Conditions: 10 mM sodium cacodylate buffer (pH 6.8), 100 mM KCl and 50 mM  $\text{MgCl}_2$ . The concentration of each oligonucleotide used was 1.89  $\mu\text{M}$ .

# Compound 3

<sup>1</sup>H NMR (CDCl<sub>3</sub>)

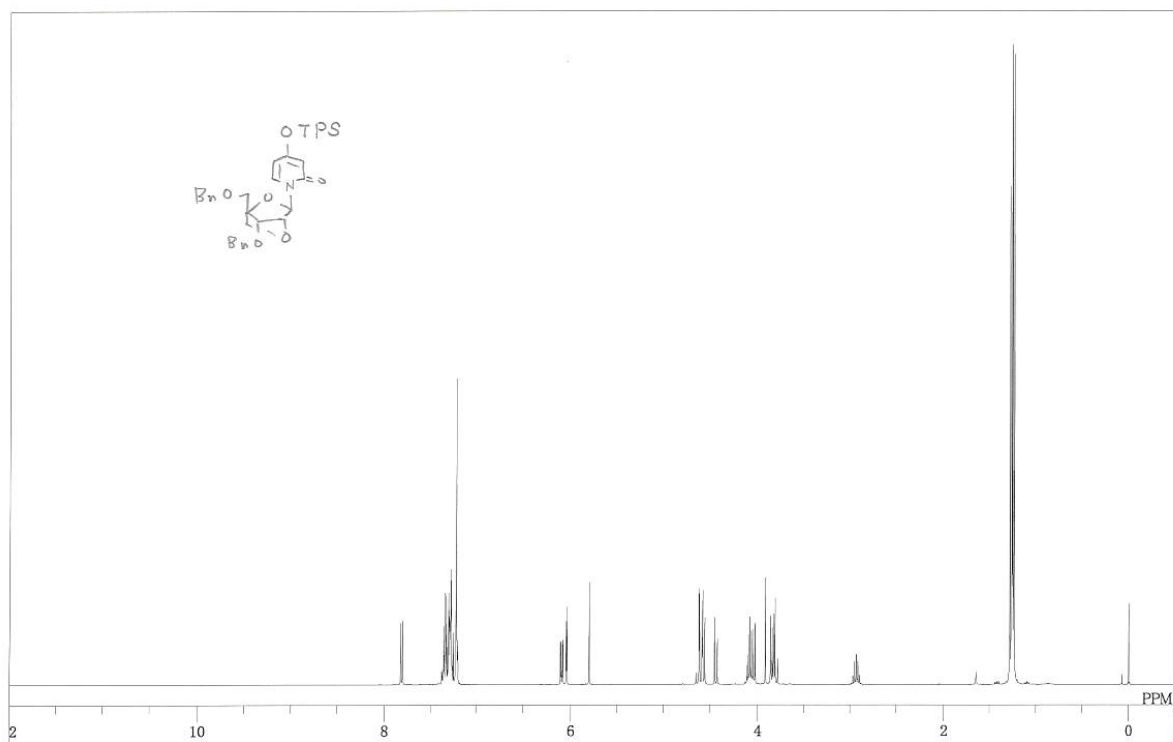

<sup>13</sup>C NMR (CDCl<sub>3</sub>)

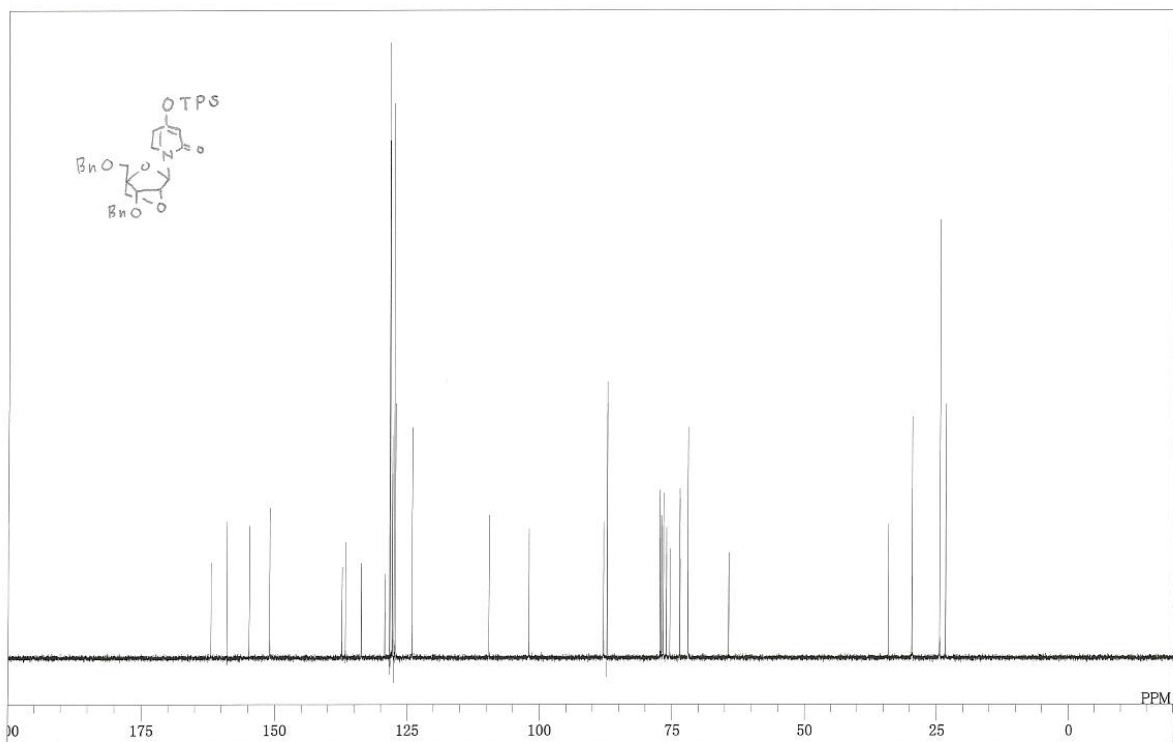

## Compound 4

<sup>1</sup>H NMR (CDCl<sub>3</sub>)

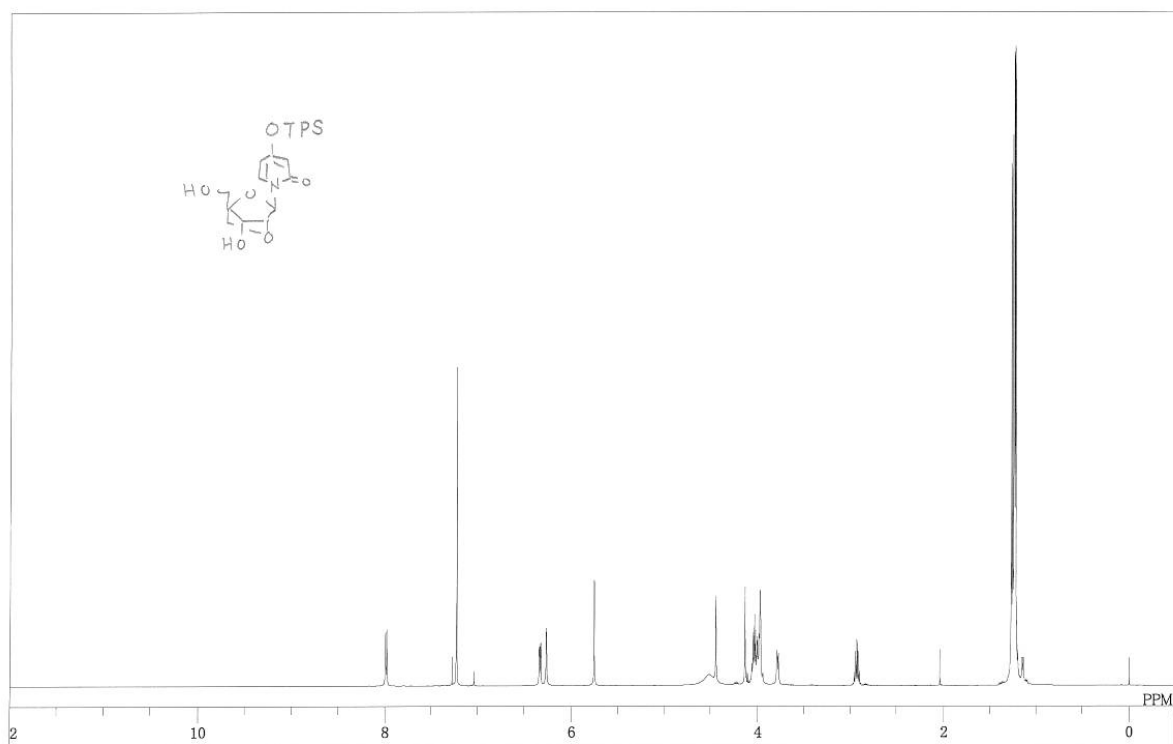

<sup>13</sup>C NMR (CDCl<sub>3</sub>)

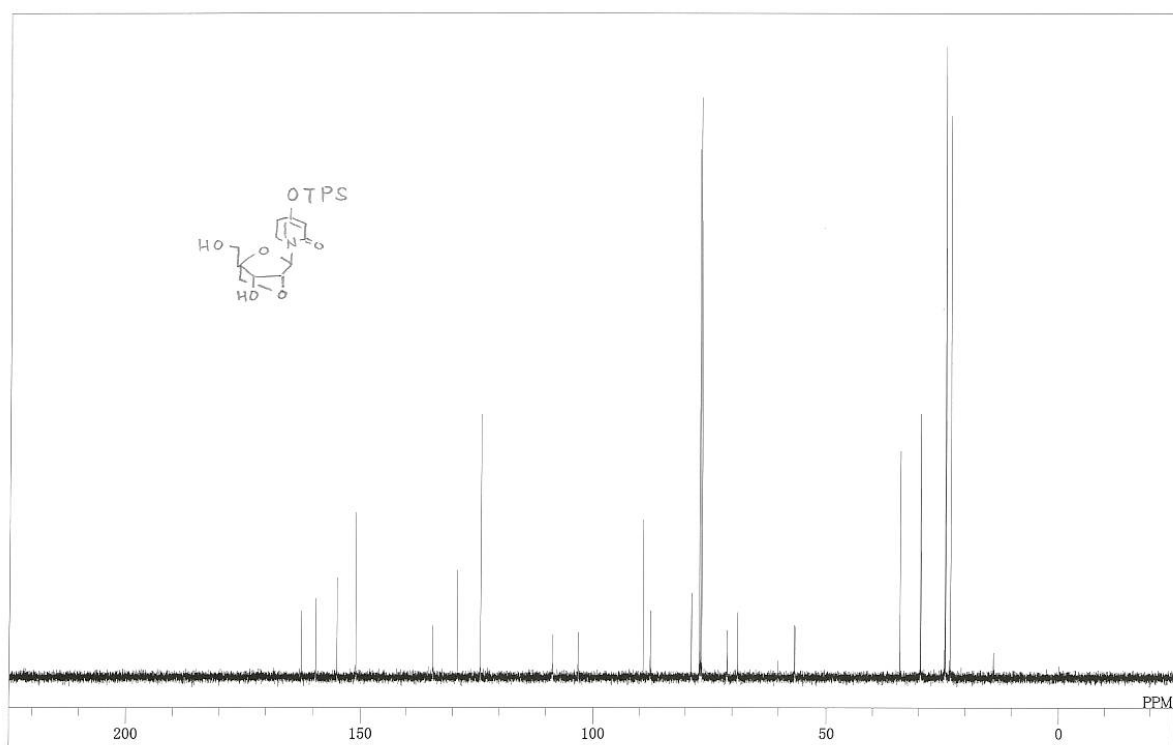

## Compound 5

<sup>1</sup>H NMR (CDCl<sub>3</sub>)

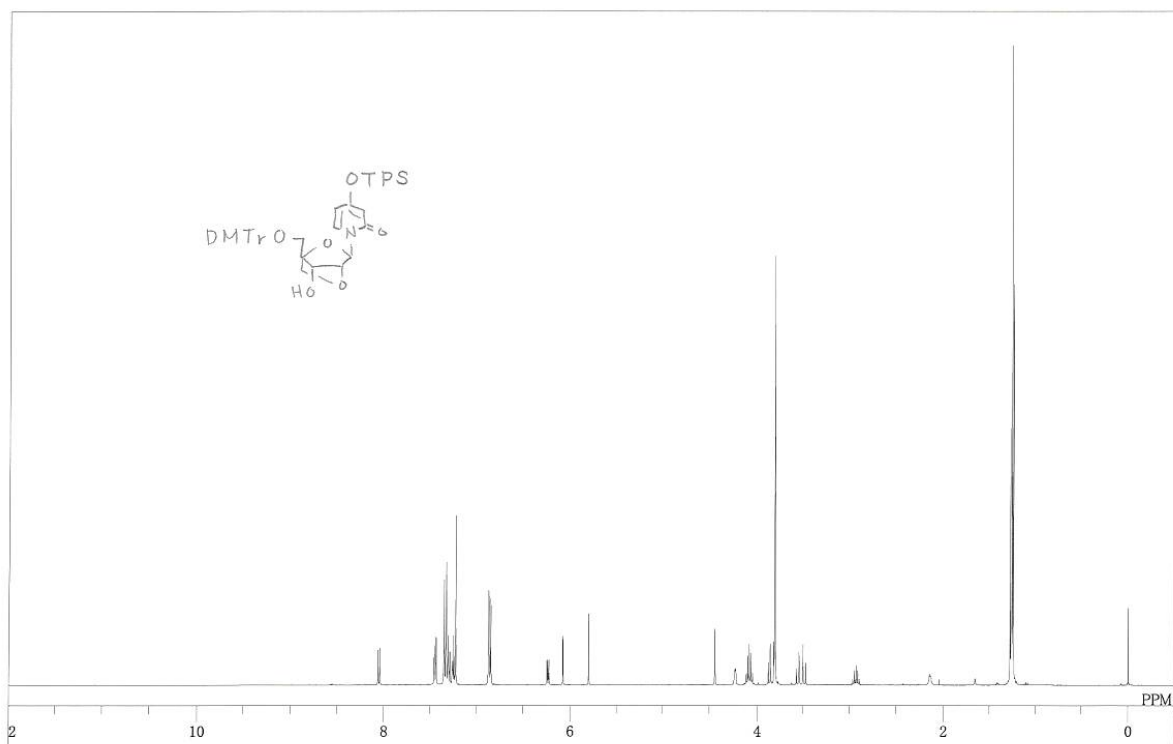

<sup>13</sup>C NMR (CDCl<sub>3</sub>)

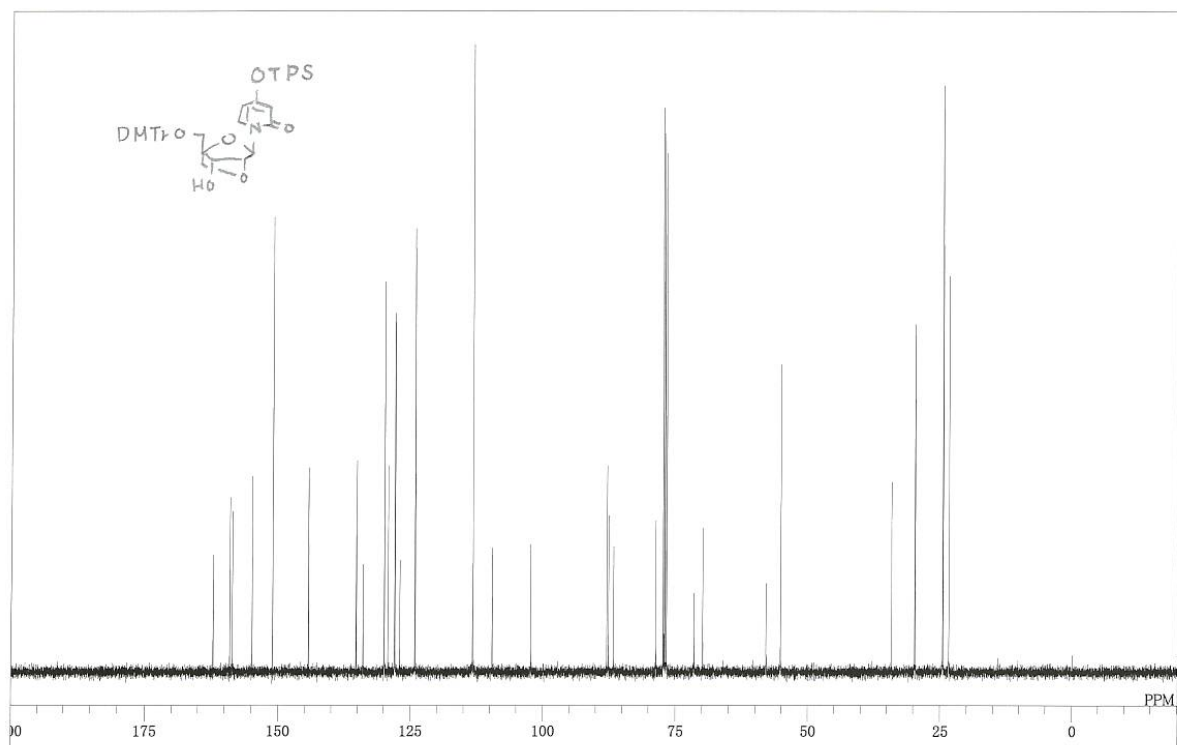

## Compound 1

<sup>1</sup>H NMR (CDCl<sub>3</sub>)

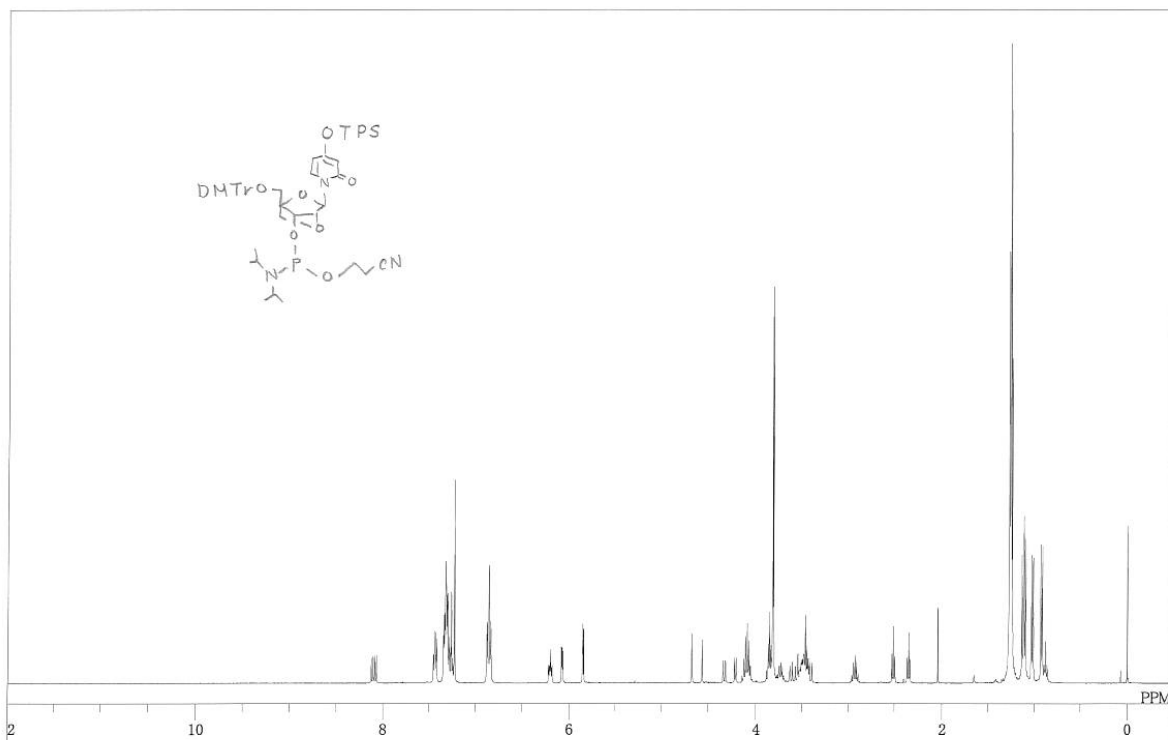

<sup>31</sup>P NMR (CDCl<sub>3</sub>)

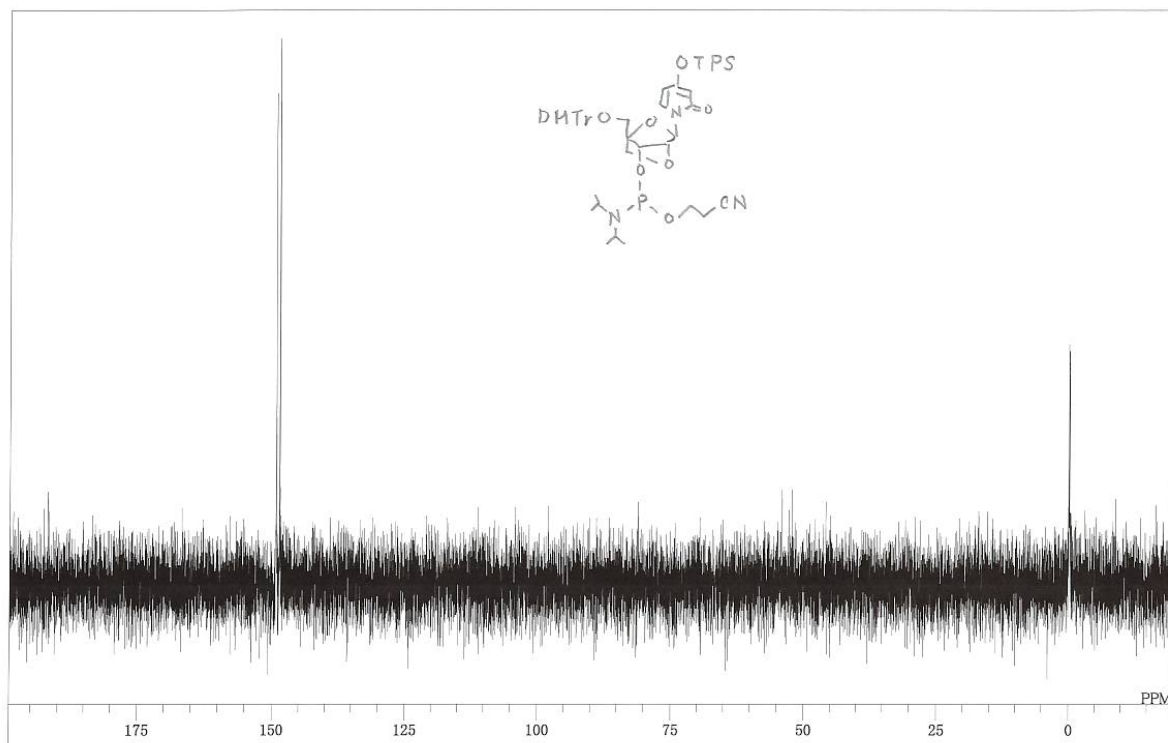

# Compound S6

<sup>1</sup>H NMR (CDCl<sub>3</sub>)

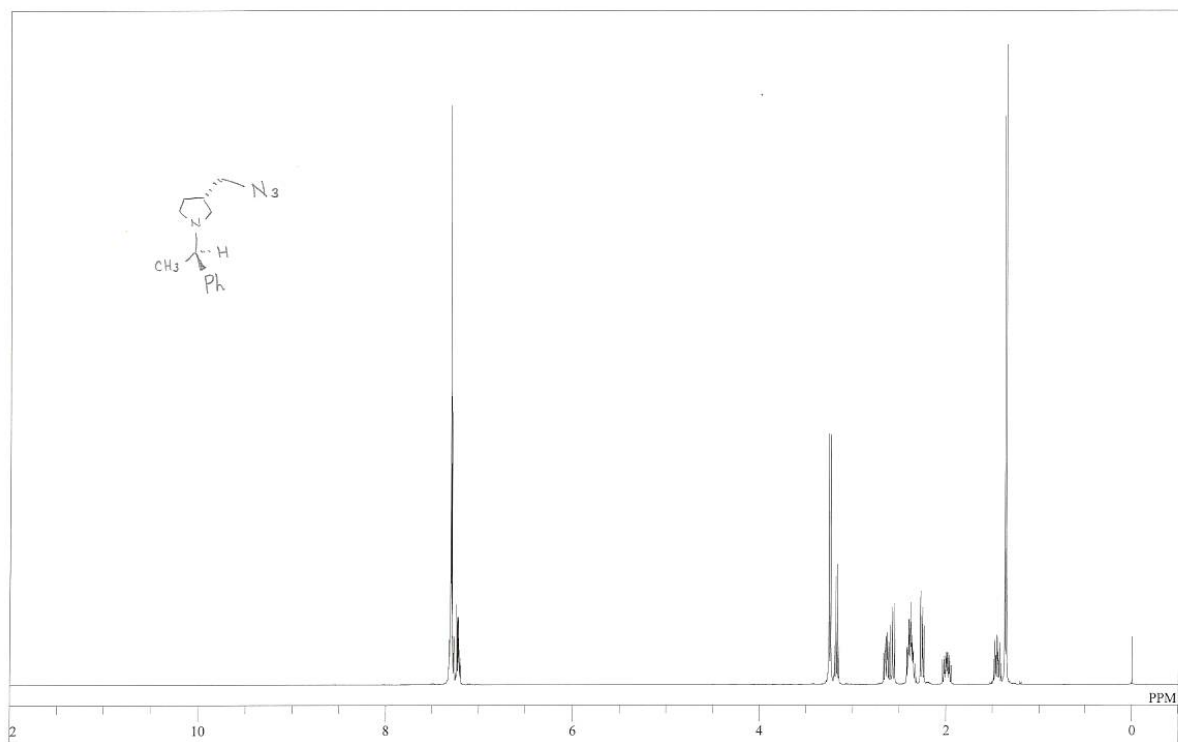

<sup>13</sup>C NMR (CDCl<sub>3</sub>)

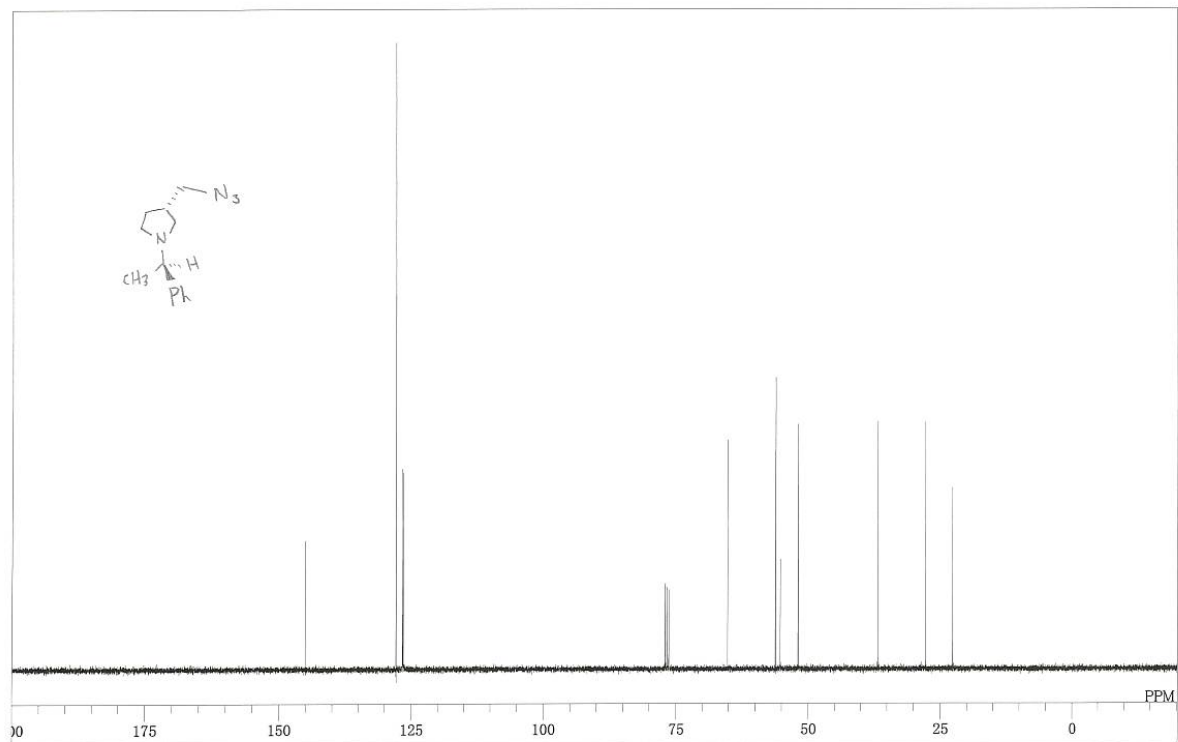

## Compound S7

<sup>1</sup>H NMR (CDCl<sub>3</sub>)

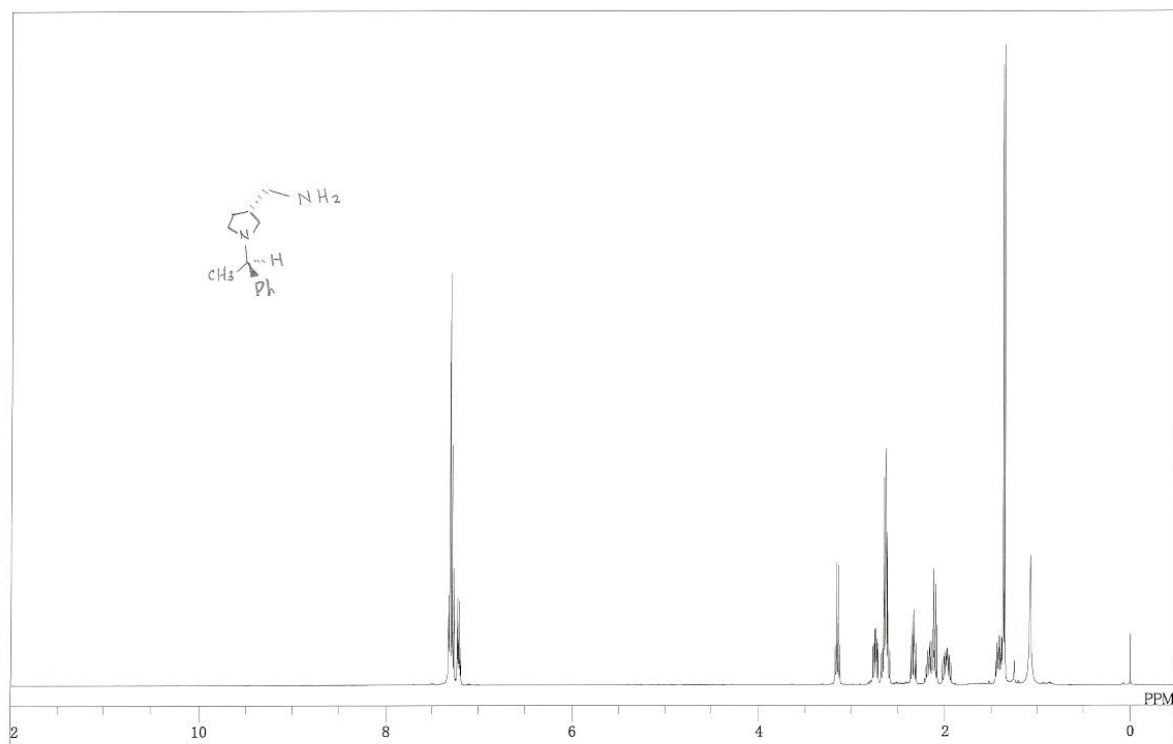

<sup>13</sup>C NMR (CDCl<sub>3</sub>)

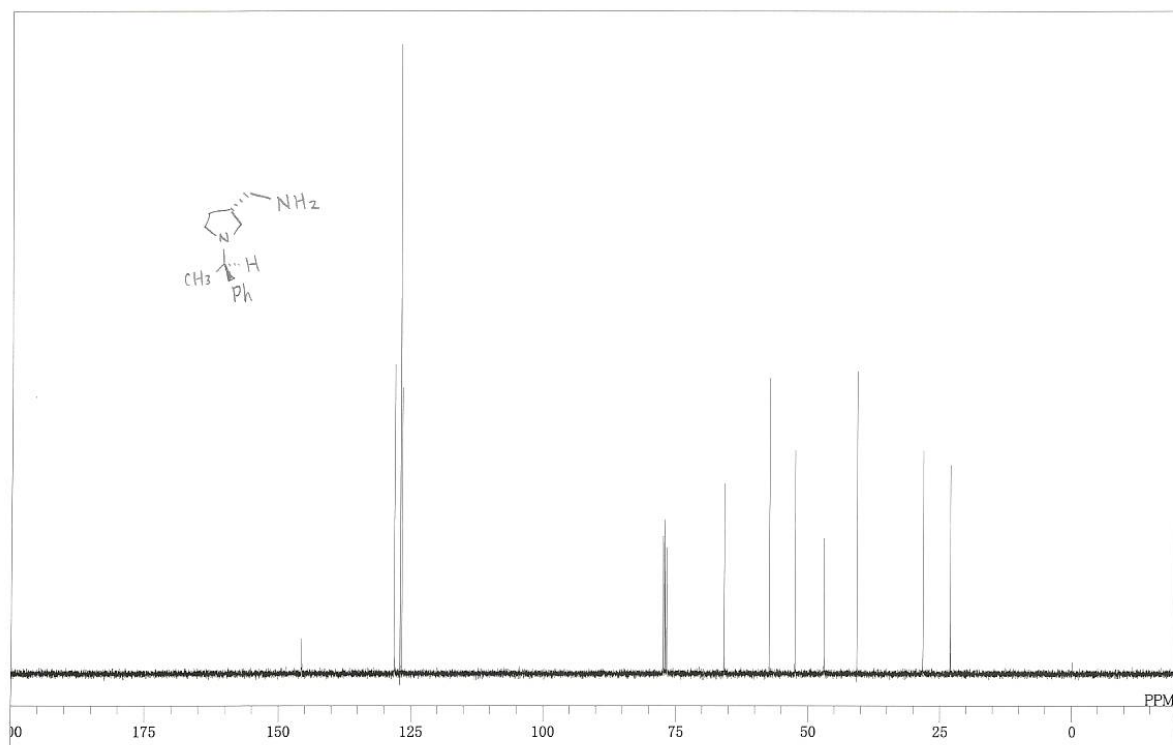

# Compound S8

<sup>1</sup>H NMR (CDCl<sub>3</sub>)

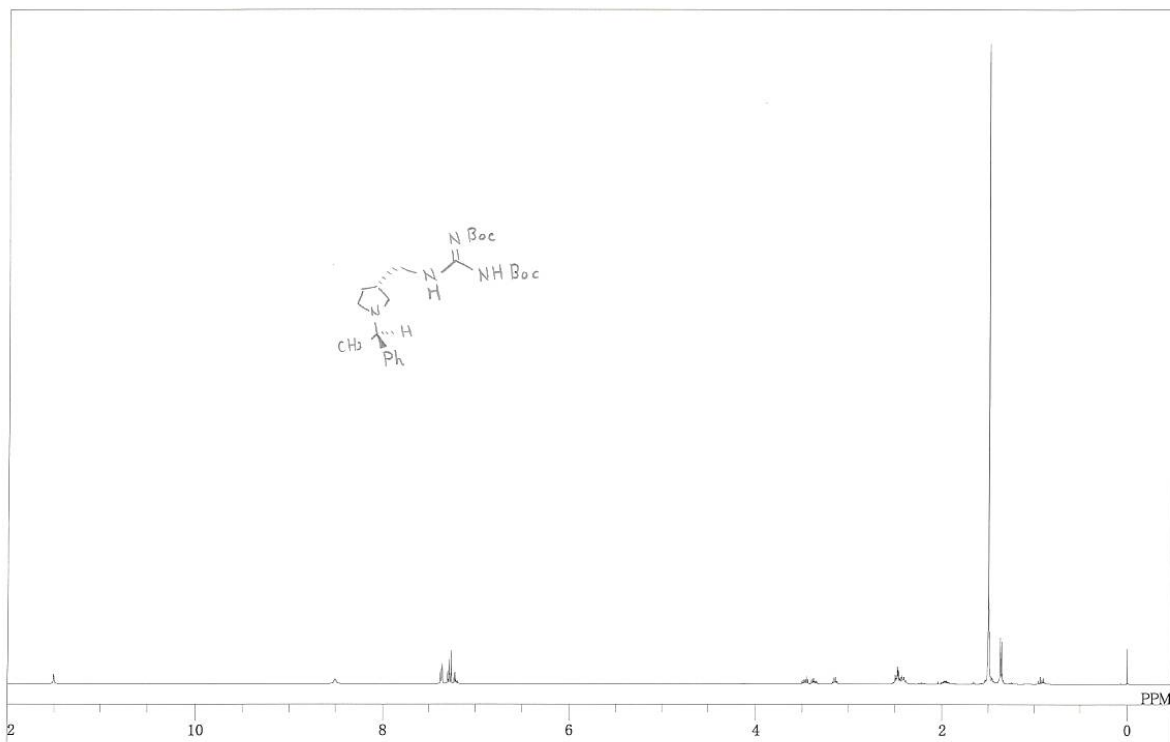

<sup>13</sup>C NMR (CDCl<sub>3</sub>)

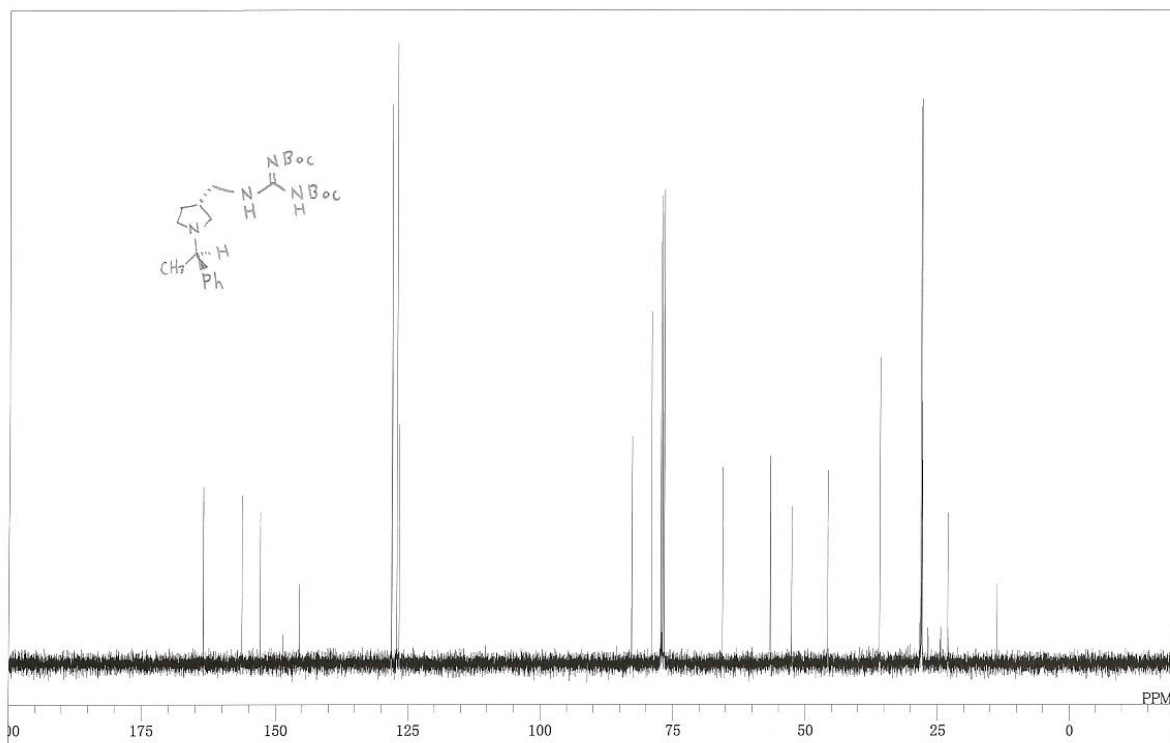

## Compound S1

<sup>1</sup>H NMR (CD<sub>3</sub>OD)

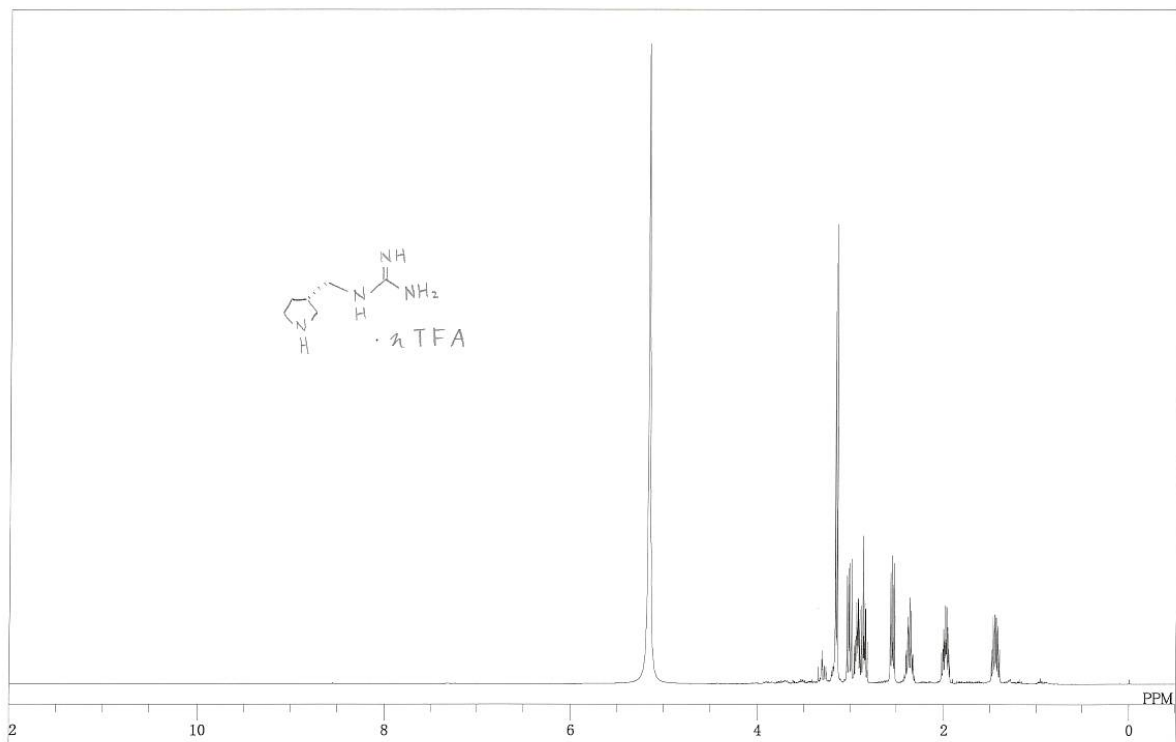

<sup>13</sup>C NMR (CD<sub>3</sub>OD)

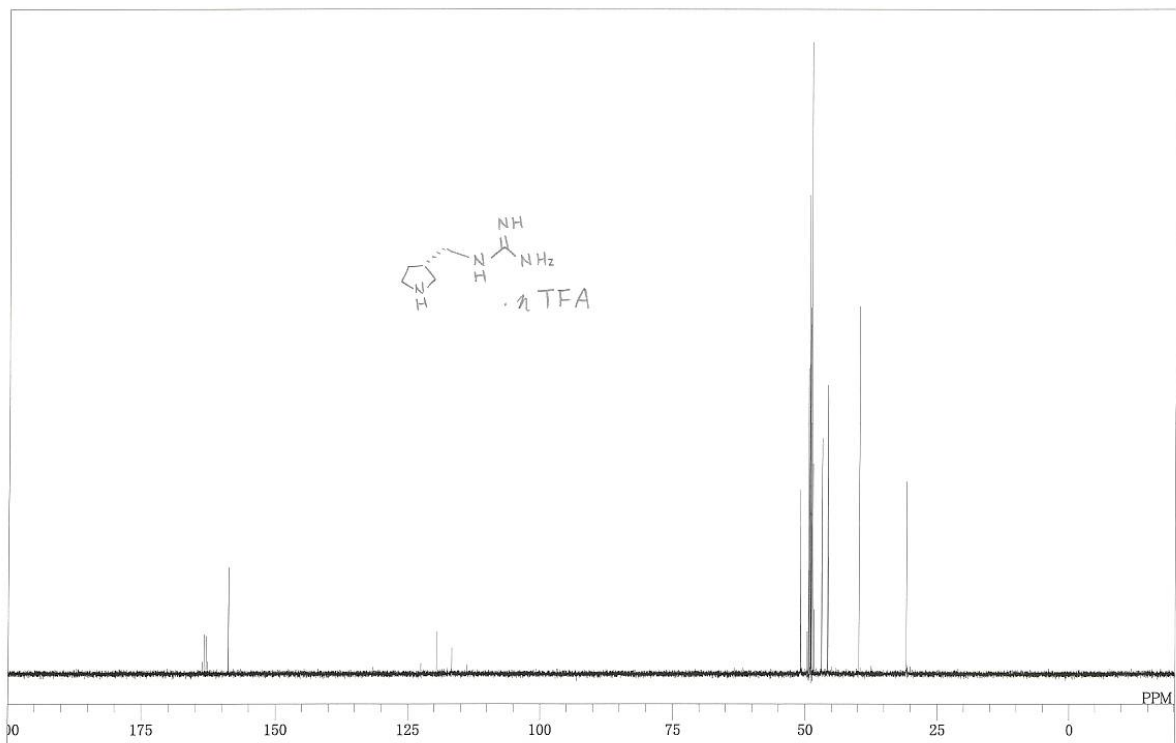

# Compound S10

<sup>1</sup>H NMR (CDCl<sub>3</sub>)

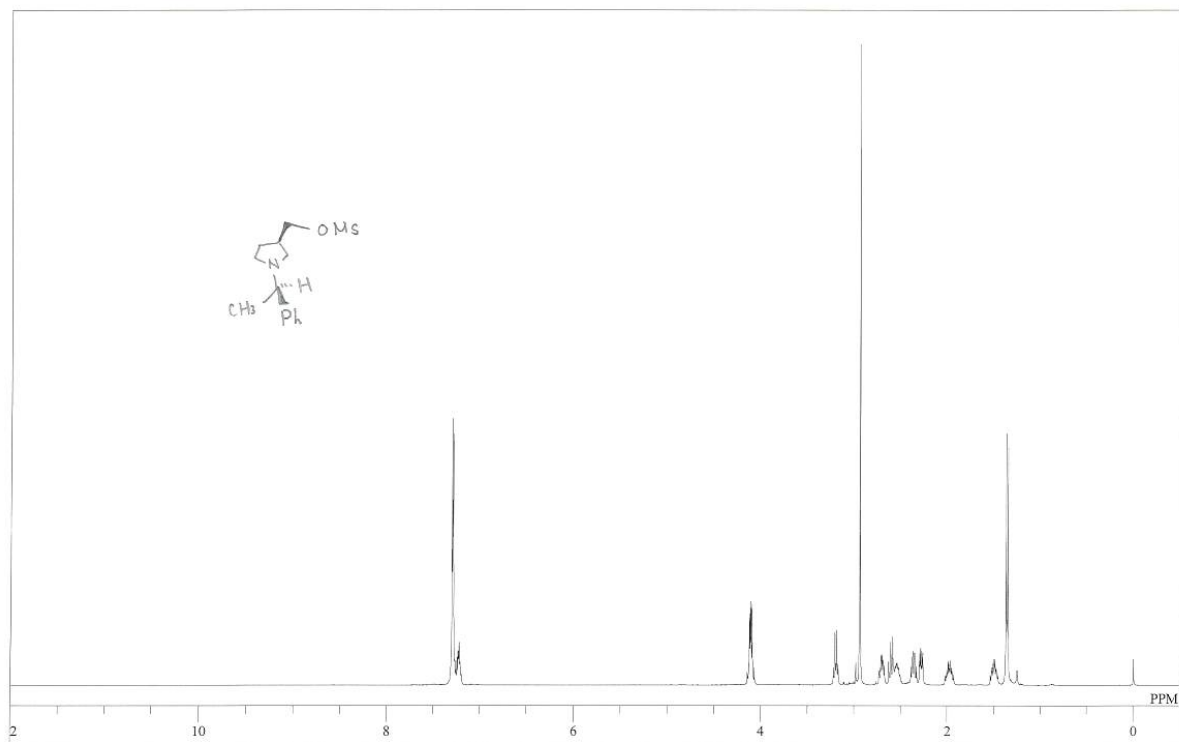

<sup>13</sup>C NMR (CDCl<sub>3</sub>)

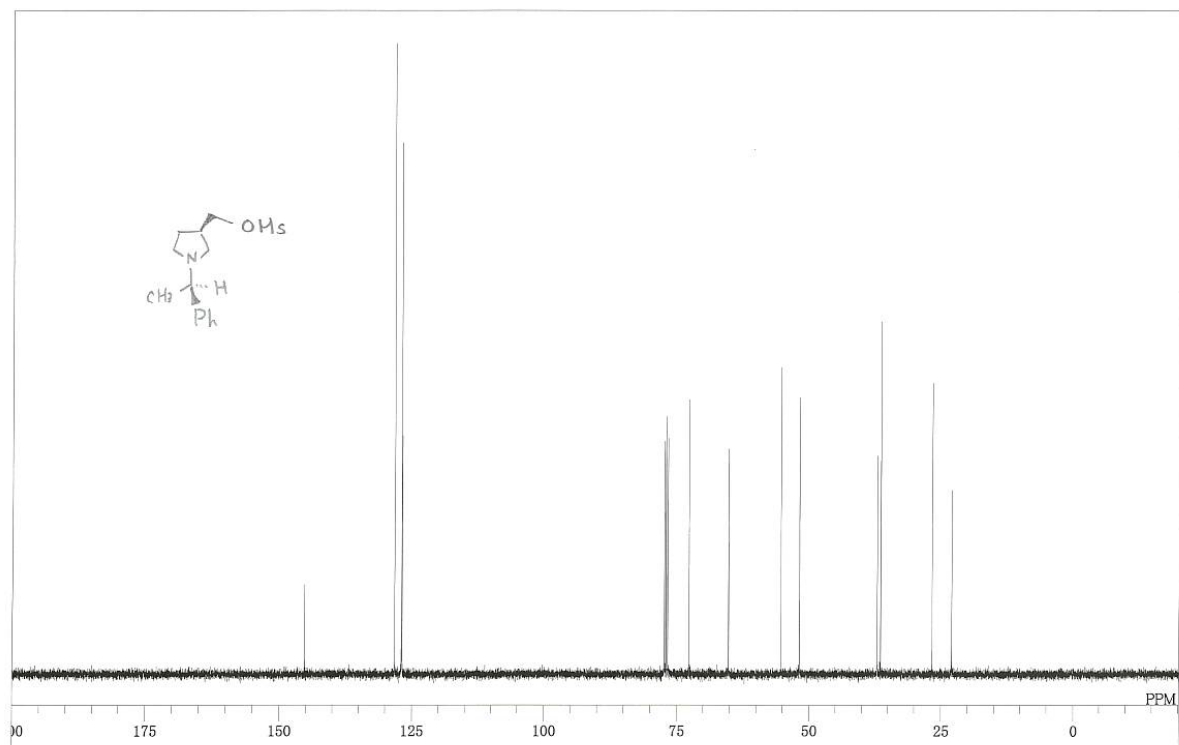

## Compound S11

<sup>1</sup>H NMR (CDCl<sub>3</sub>)

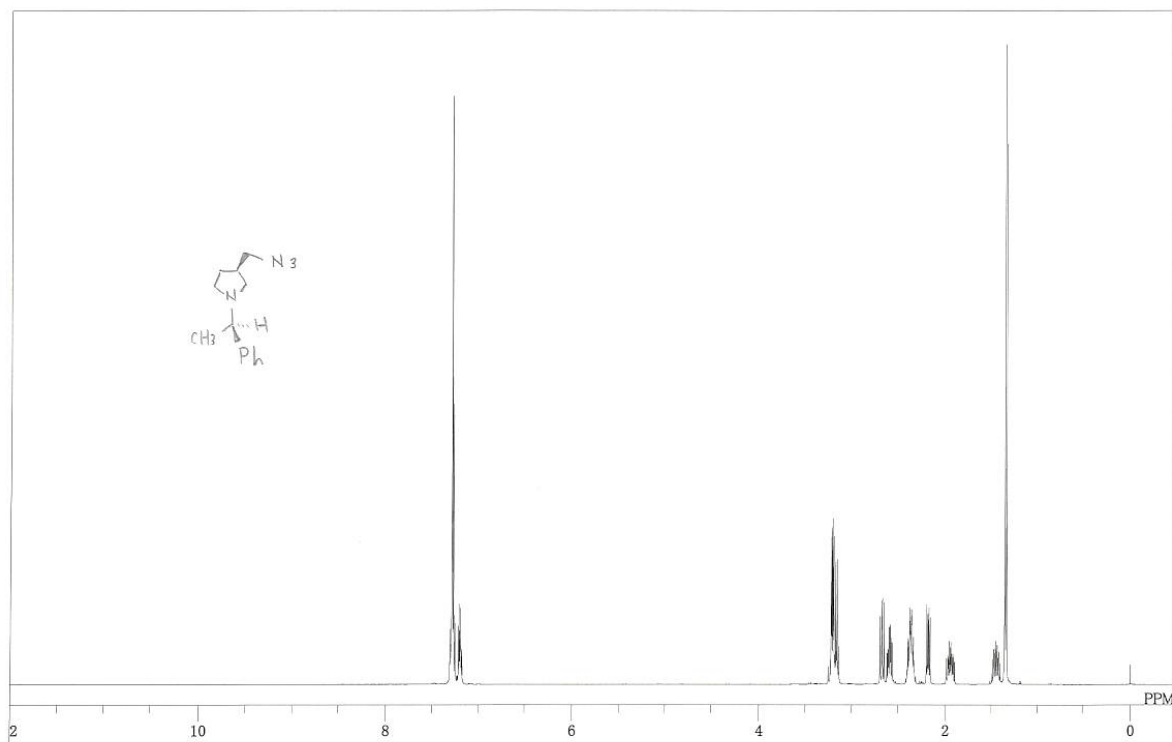

<sup>13</sup>C NMR (CDCl<sub>3</sub>)

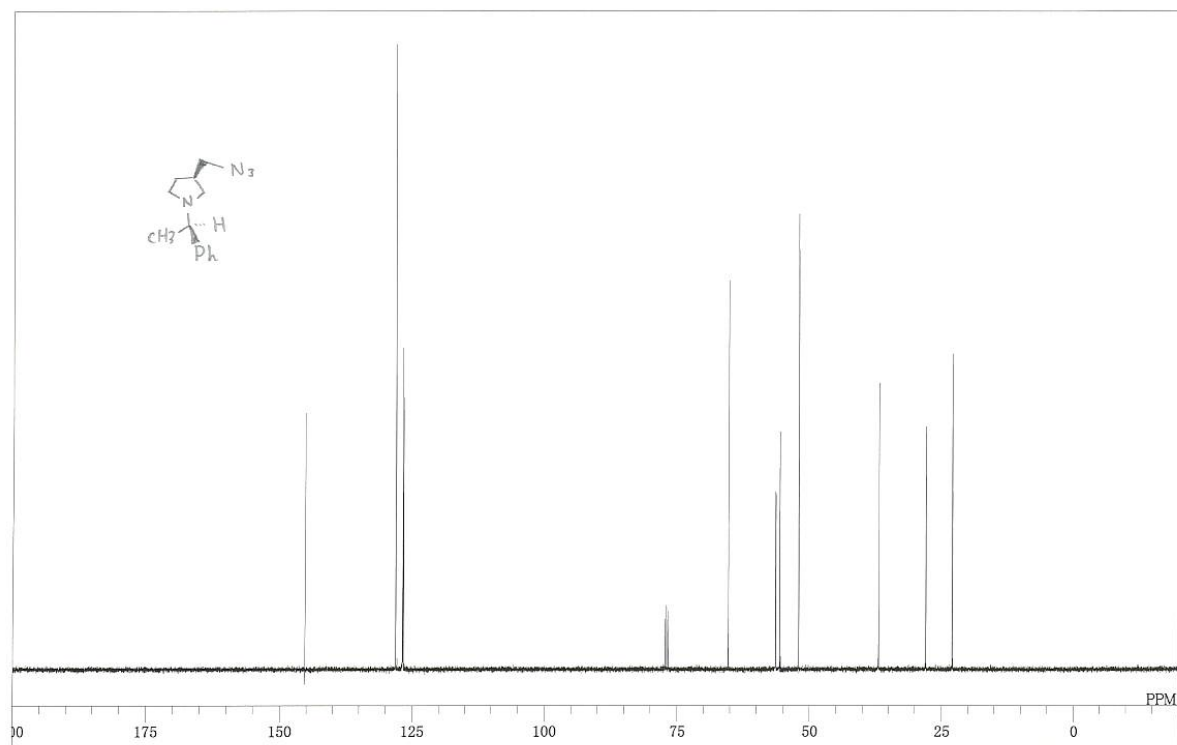

## Compound S12

<sup>1</sup>H NMR (CDCl<sub>3</sub>)

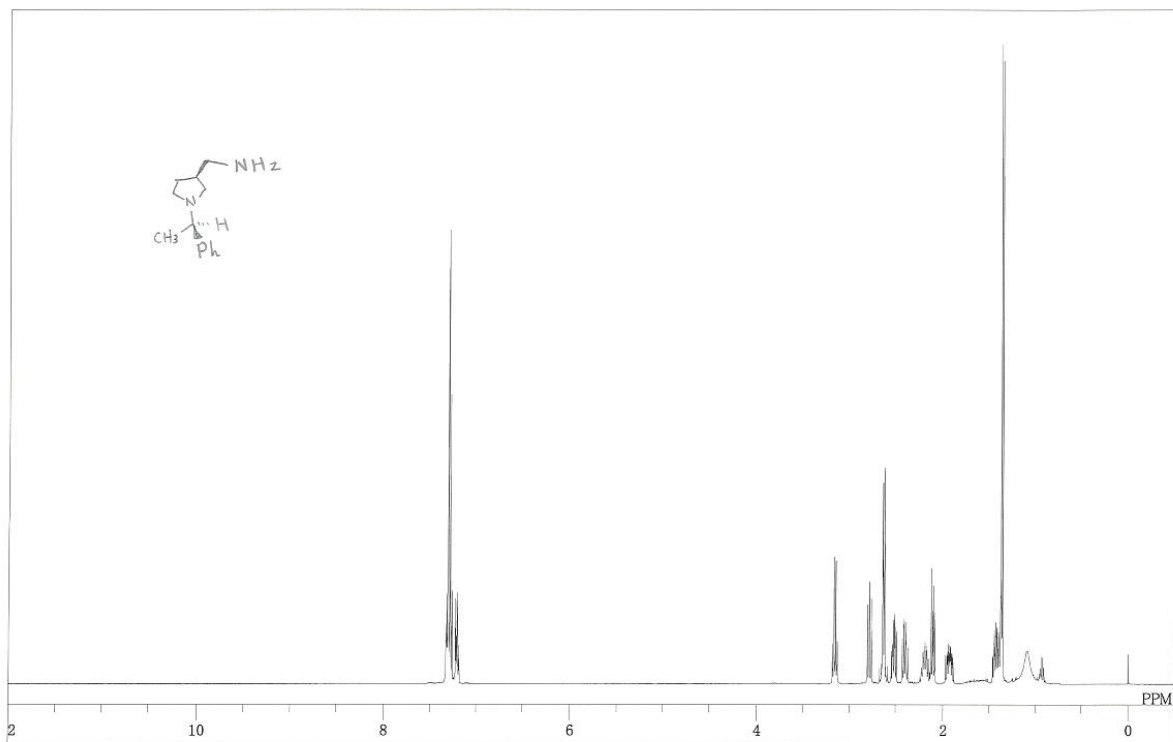

<sup>13</sup>C NMR (CDCl<sub>3</sub>)

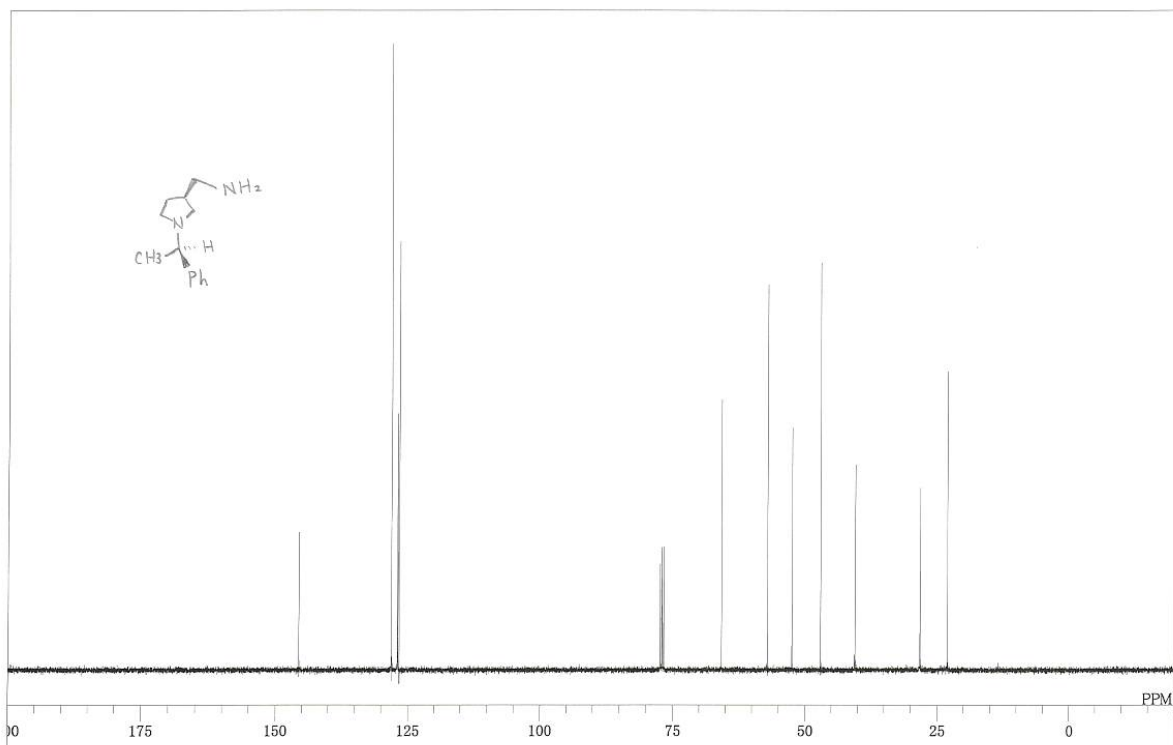

# Compound S13

<sup>1</sup>H NMR (CDCl<sub>3</sub>)

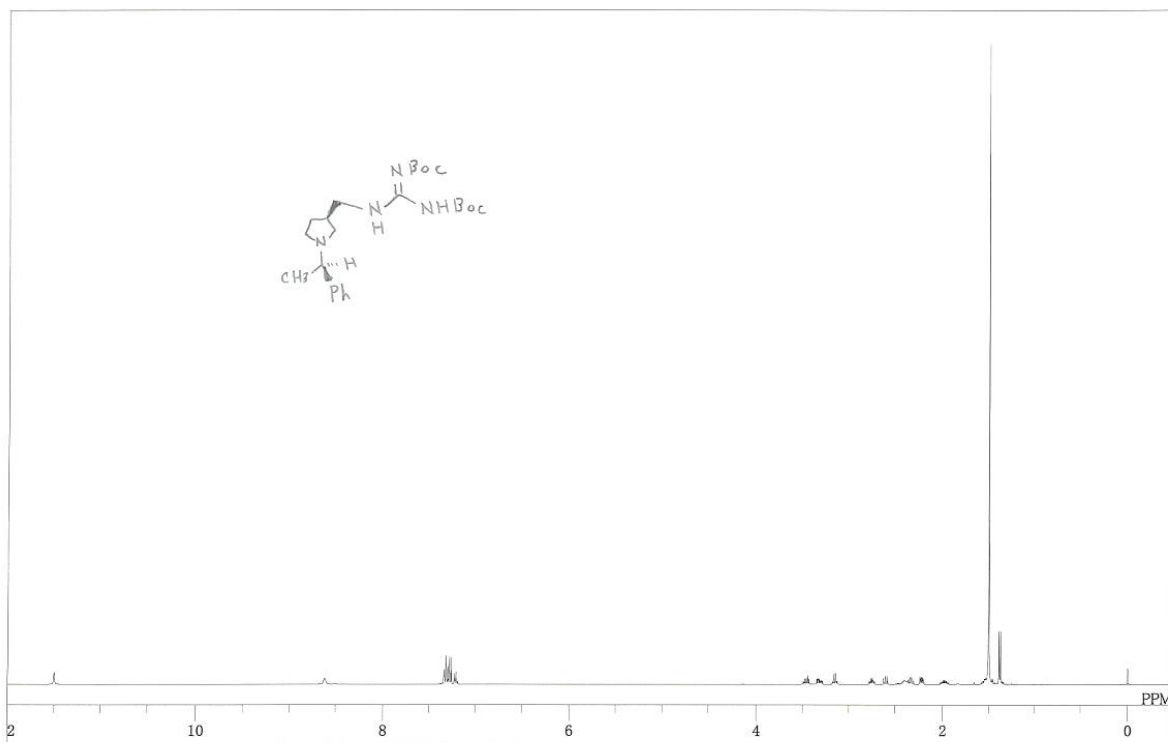

<sup>13</sup>C NMR (CDCl<sub>3</sub>)

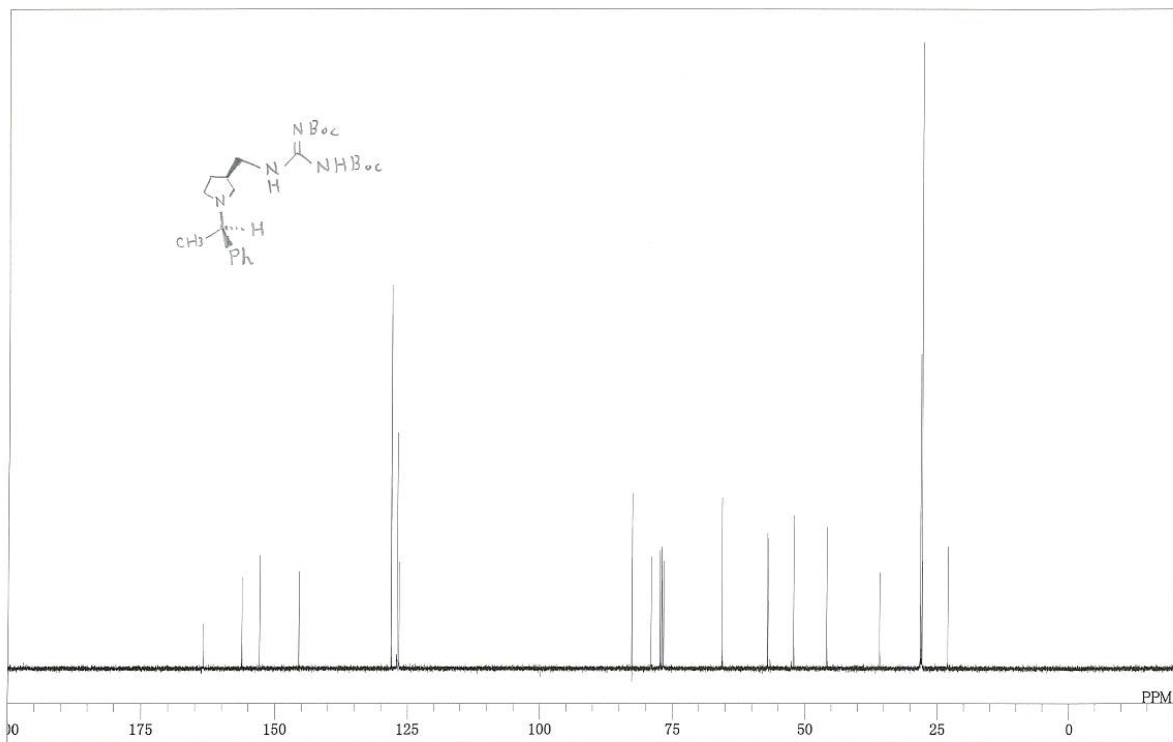

## Compound S2

<sup>1</sup>H NMR (CD<sub>3</sub>OD)

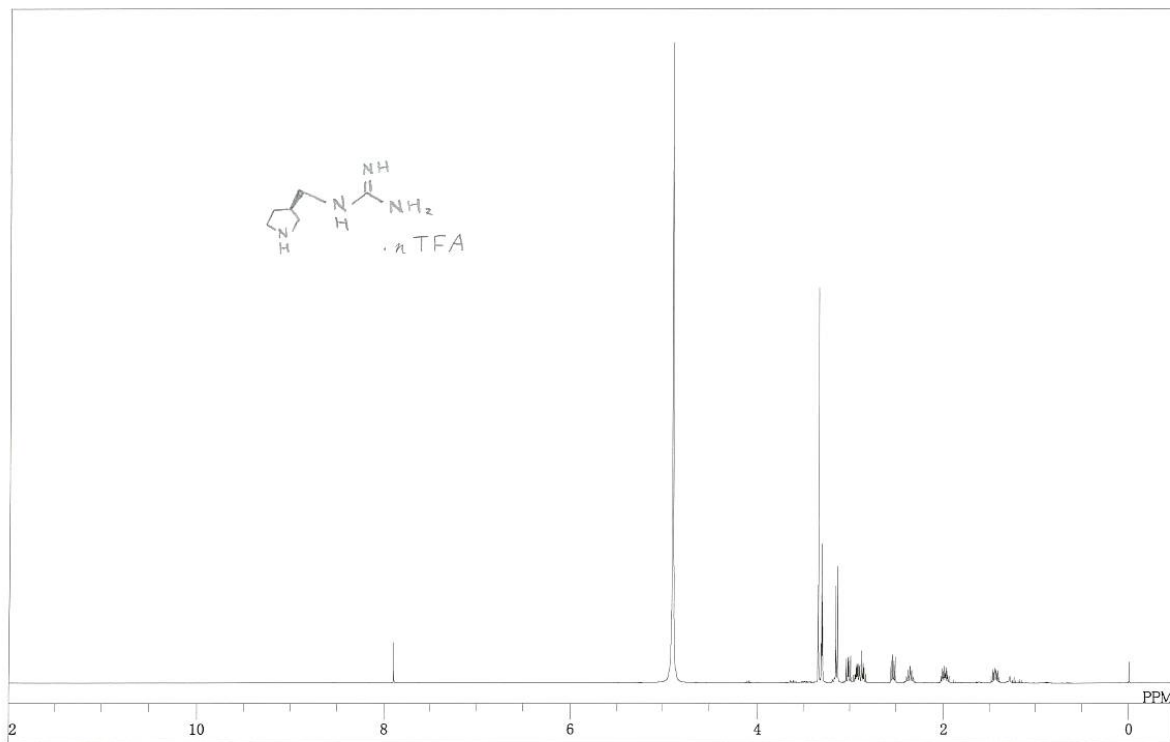

<sup>13</sup>C NMR (CD<sub>3</sub>OD)

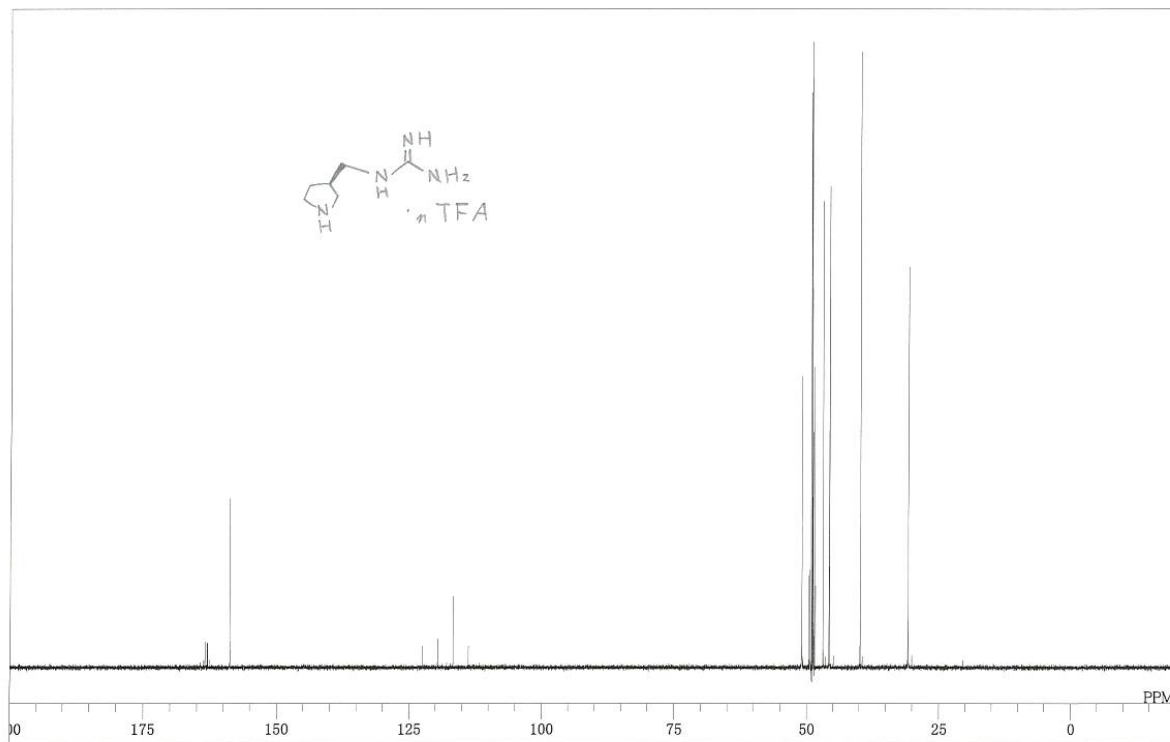

# Compound S15

<sup>1</sup>H NMR (CDCl<sub>3</sub>)

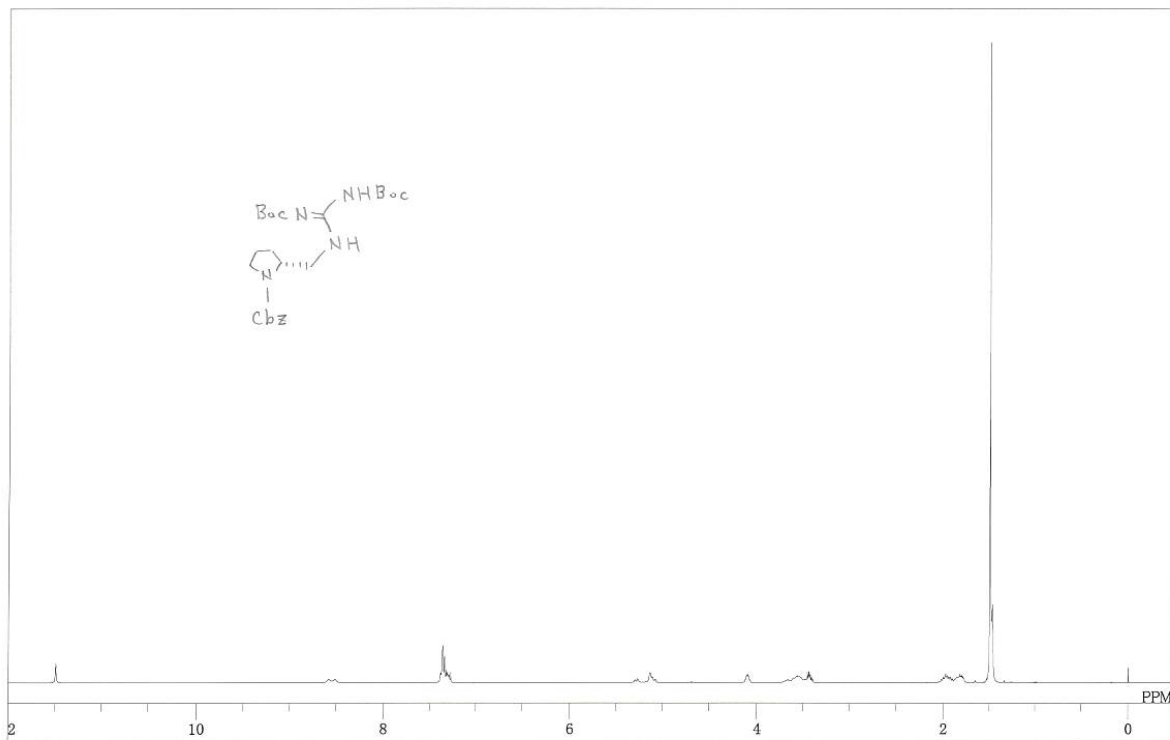

<sup>13</sup>C NMR (CDCl<sub>3</sub>)

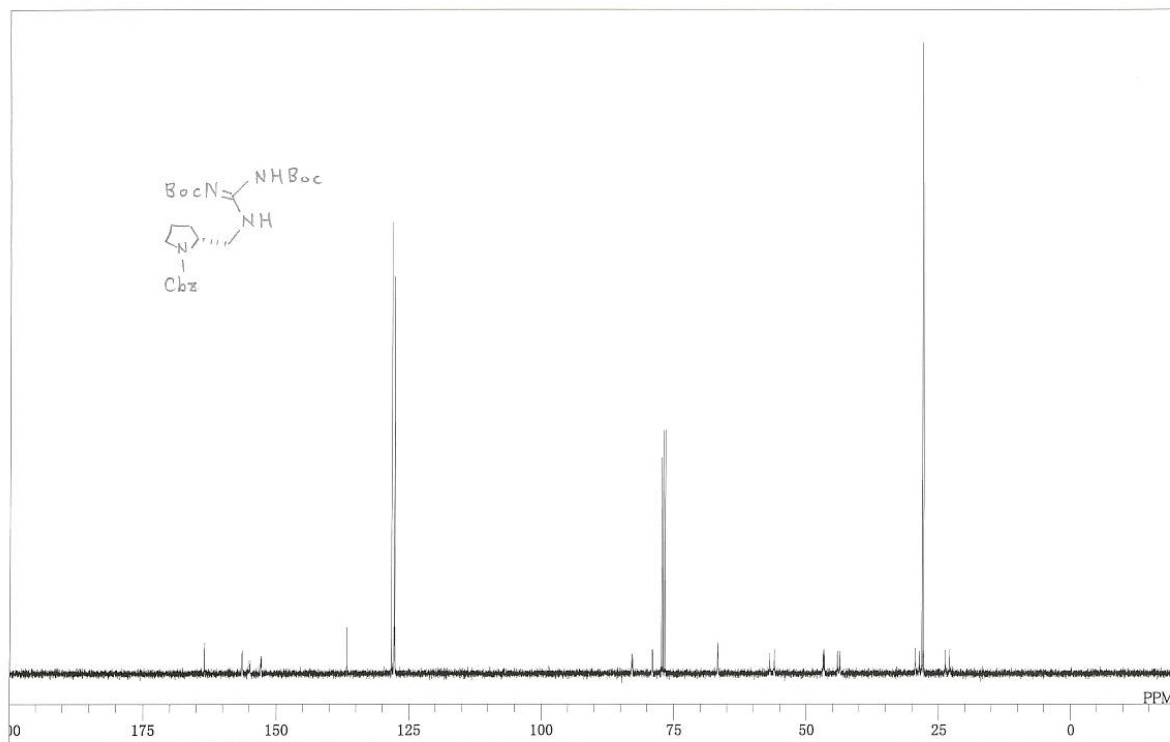

## Compound S3

<sup>1</sup>H NMR (CD<sub>3</sub>OD)

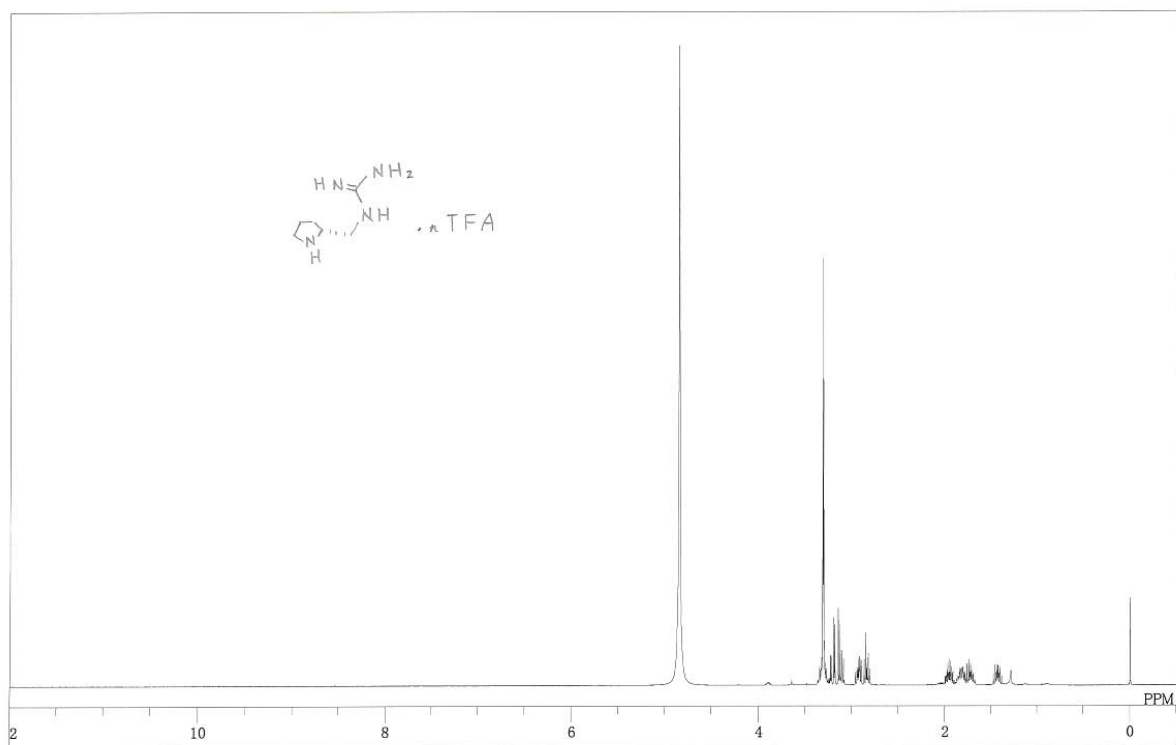

<sup>13</sup>C NMR (CDCl<sub>3</sub>)

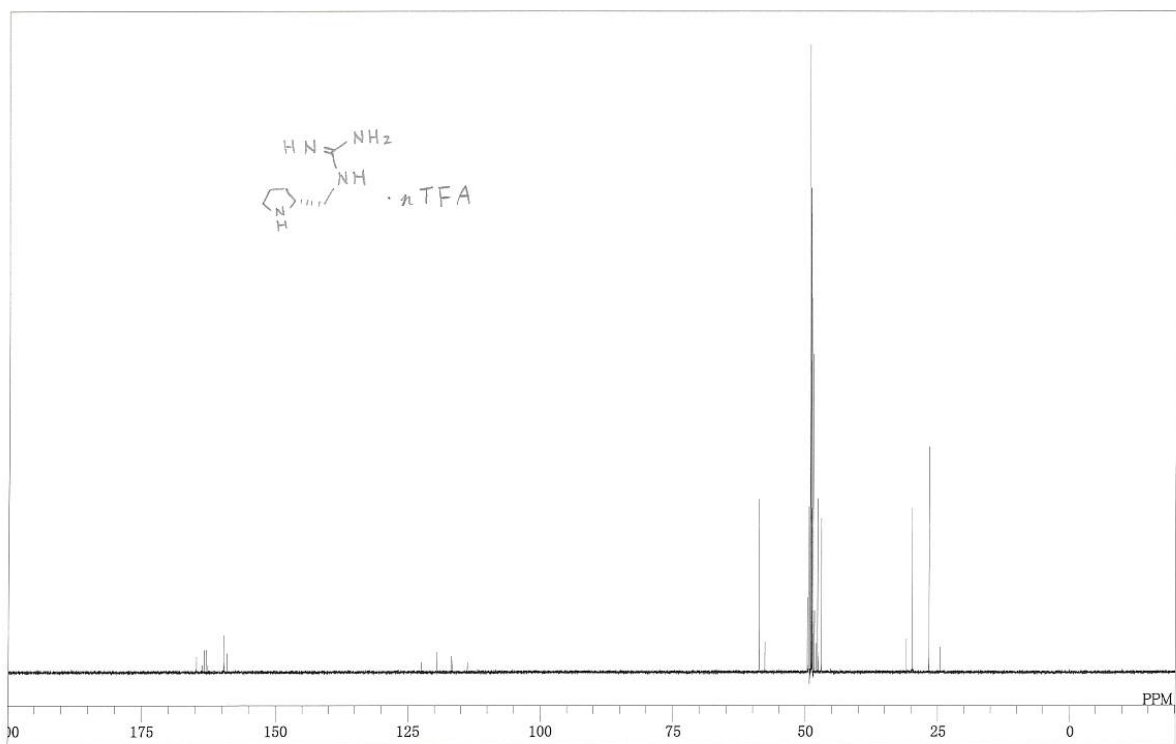

# Compound S17

<sup>1</sup>H NMR (CDCl<sub>3</sub>)

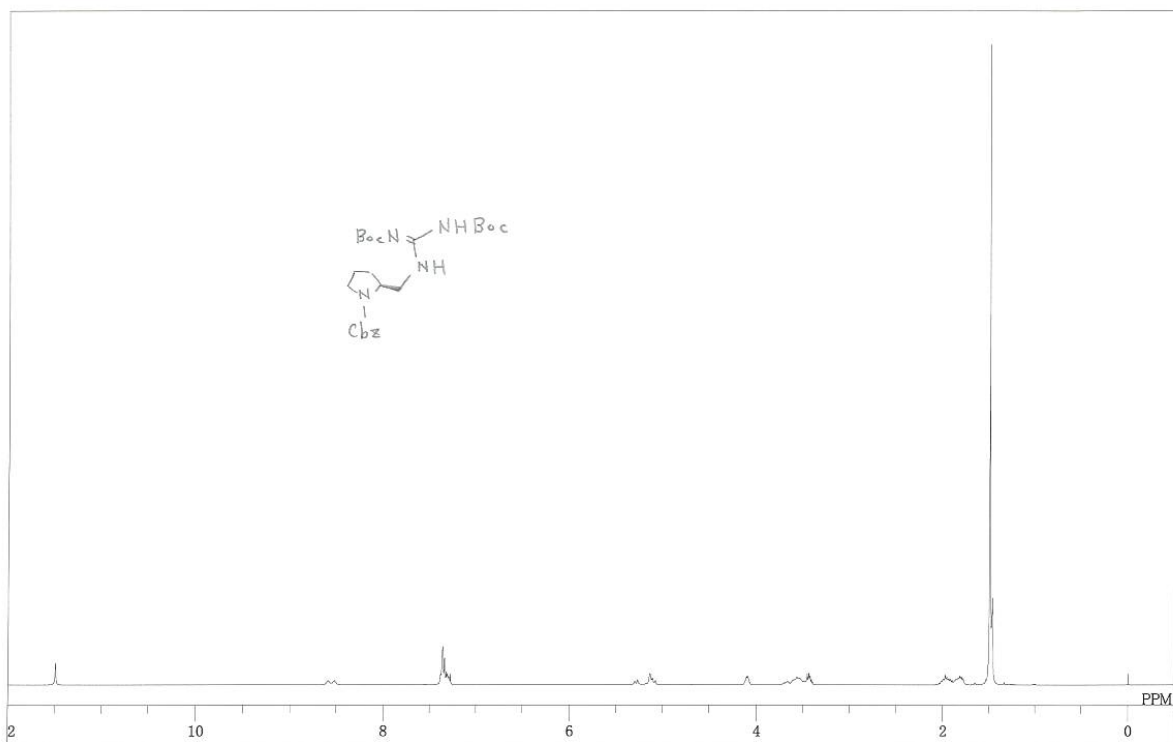

<sup>13</sup>C NMR (CDCl<sub>3</sub>)

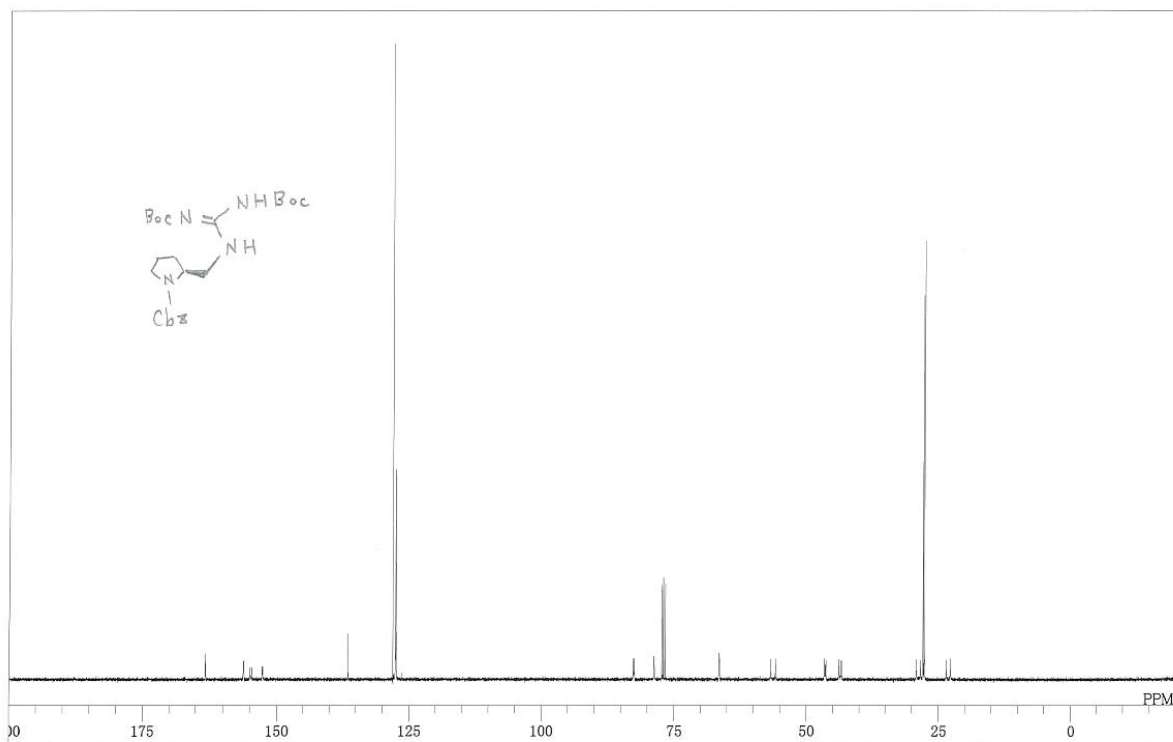

## Compound S4

<sup>1</sup>H NMR (CD<sub>3</sub>OD)

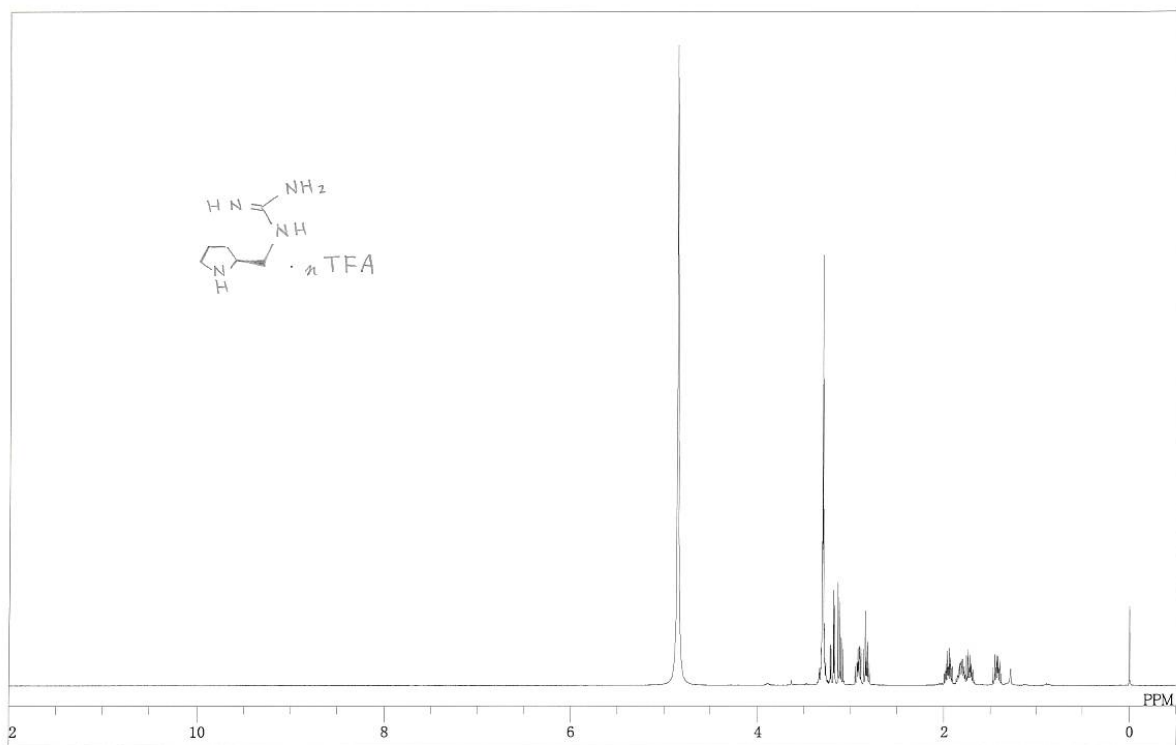

<sup>13</sup>C NMR (CD<sub>3</sub>OD)

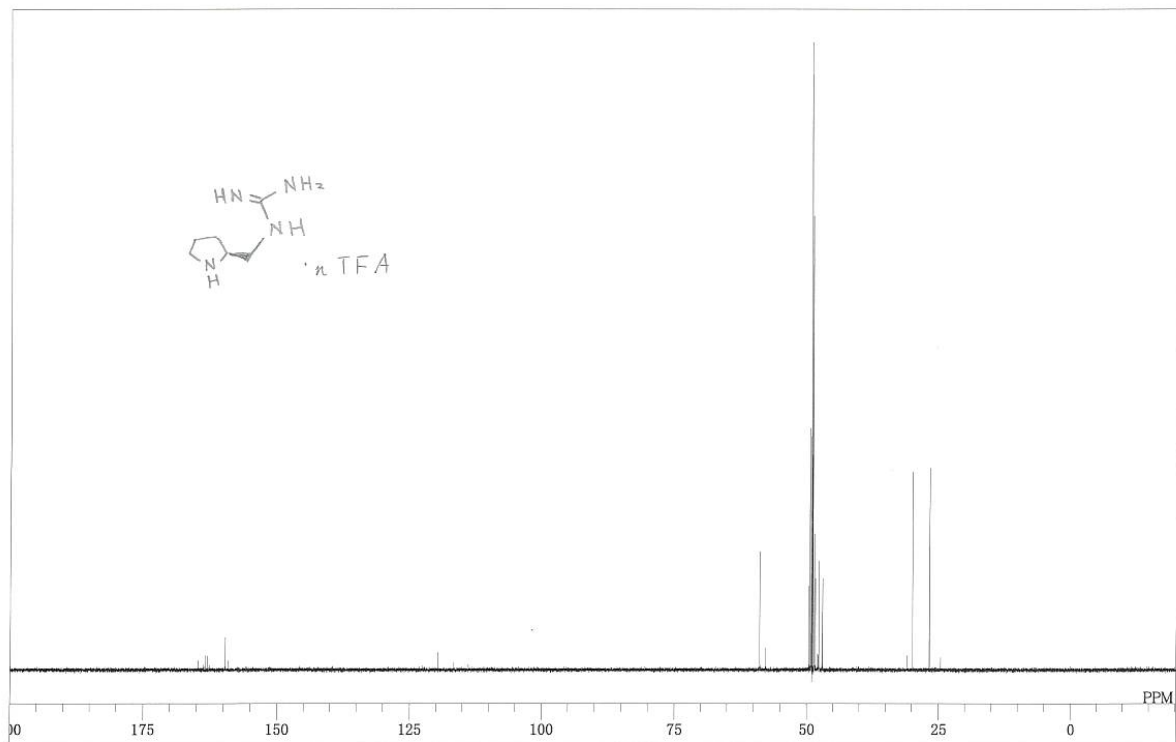

## TFO 7a

### HPLC

Column : Waters XBridge® MS C<sub>18</sub> 2.5 μm, 4.6 × 50 mm

Gradient : 7–13% MeCN in triethylammonium acetate (0.1 M, pH 7.0) buffer

Flow rate : 1.0 mL/min

Column temp. : 50 °C

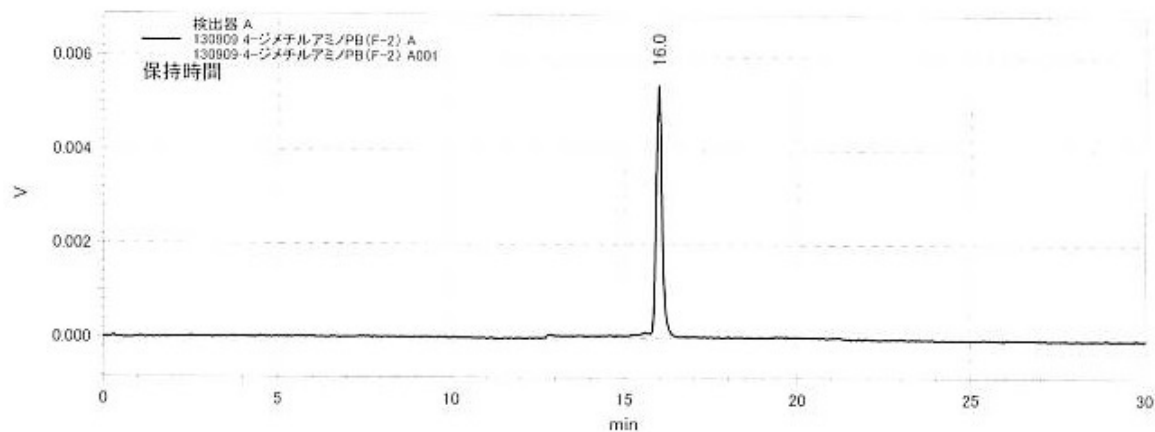

### MALDI-TOF-Mass

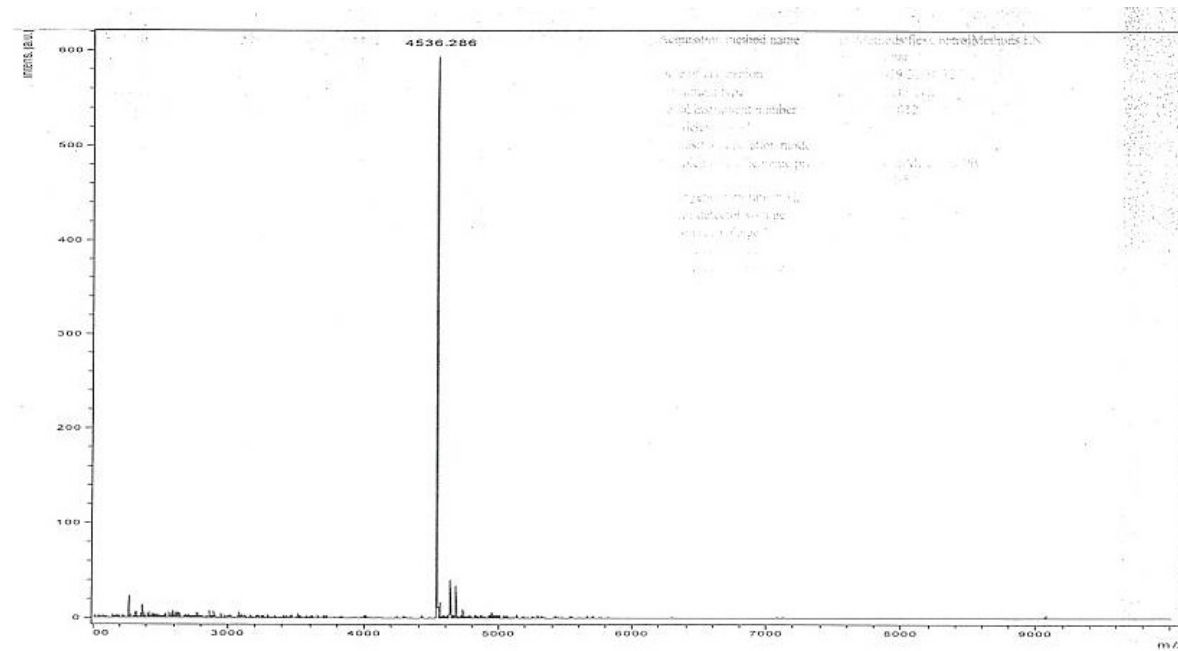

## TFO 7b

### HPLC

Column : Waters XBridge® MS C<sub>18</sub> 2.5 μm, 4.6 × 50 mm

Gradient : 7–13% MeCN in triethylammonium acetate (0.1 M, pH 7.0) buffer

Flow rate : 1.0 mL/min

Column temp. : 50 °C

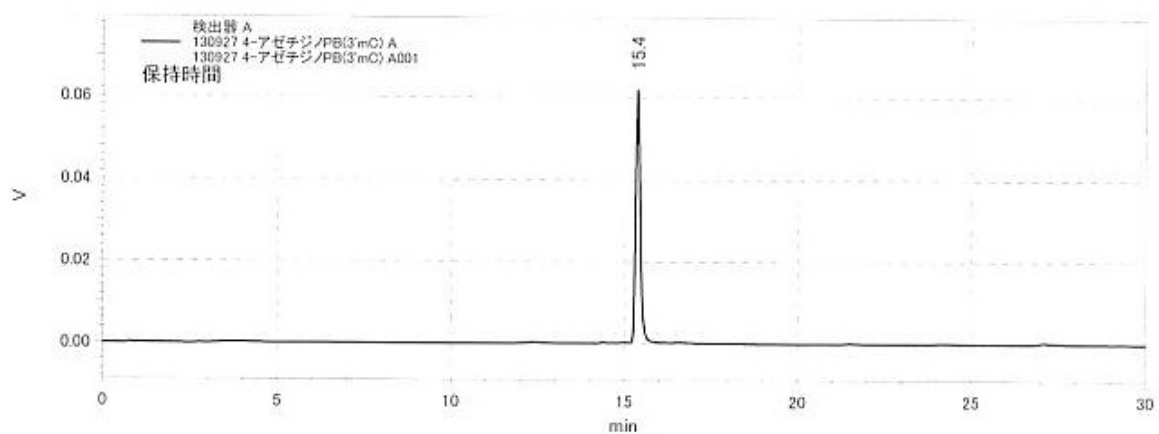

### MALDI-TOF-Mass

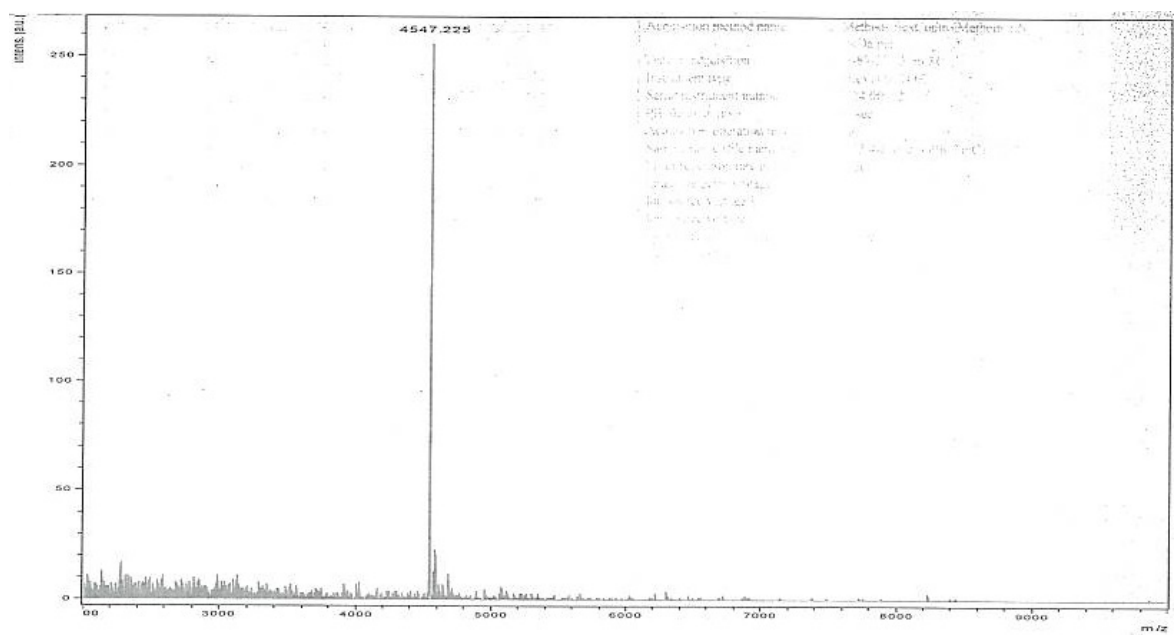

## TFO 7c

### HPLC

Column : Waters XBridge® MS C<sub>18</sub> 2.5 μm, 4.6 × 50 mm

Gradient : 7–13% MeCN in triethylammonium acetate (0.1 M, pH 7.0) buffer

Flow rate : 1.0 mL/min

Column temp. : 50 °C

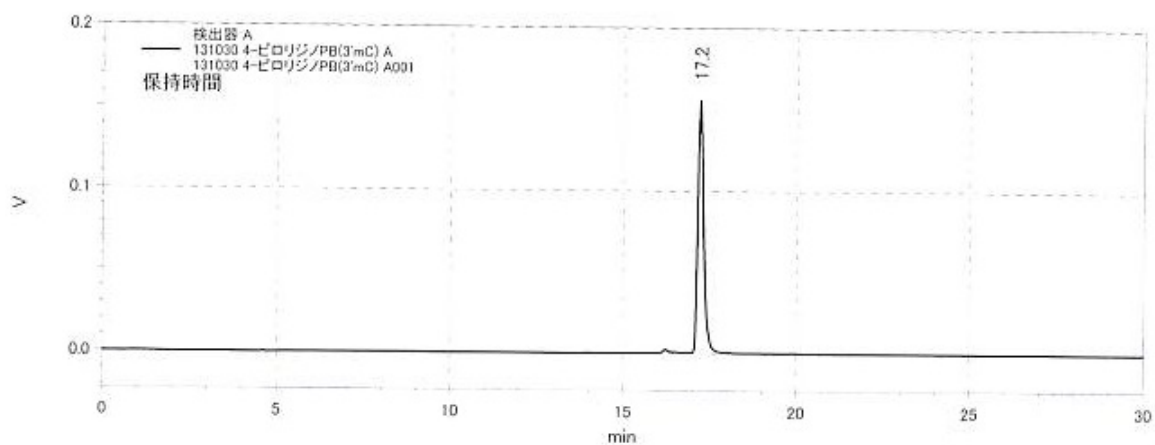

### MALDI-TOF-Mass

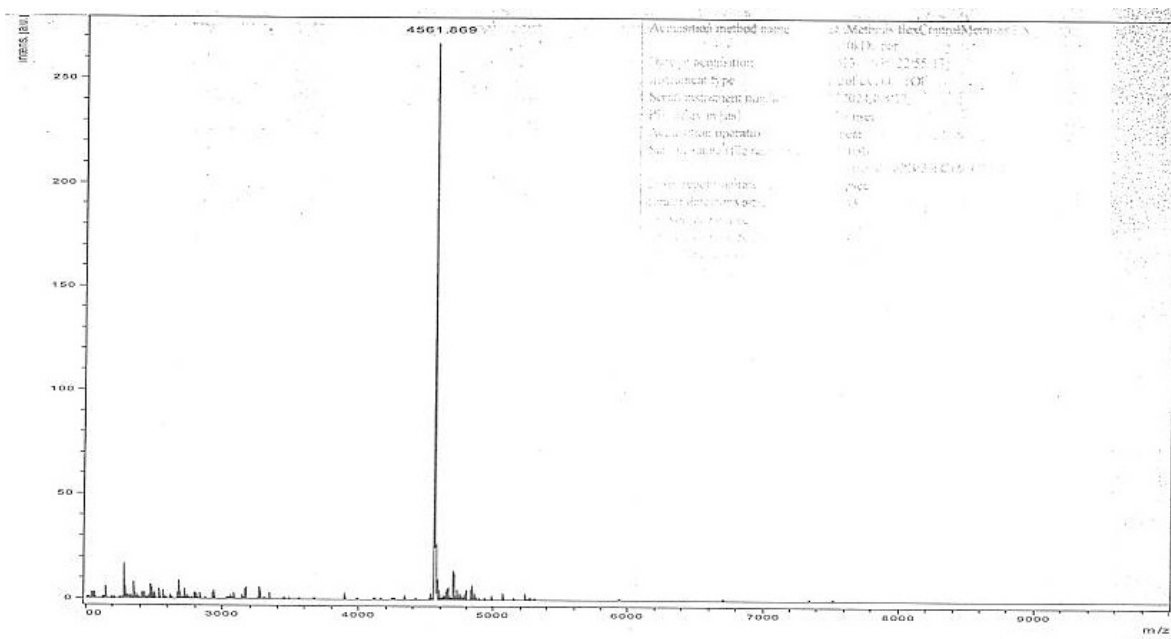

## TFO 7d

### HPLC

Column : Waters XBridge® MS C<sub>18</sub> 2.5 μm, 4.6 × 50 mm

Gradient : 7–13% MeCN in triethylammonium acetate (0.1 M, pH 7.0) buffer

Flow rate : 1.0 mL/min

Column temp. : 50 °C

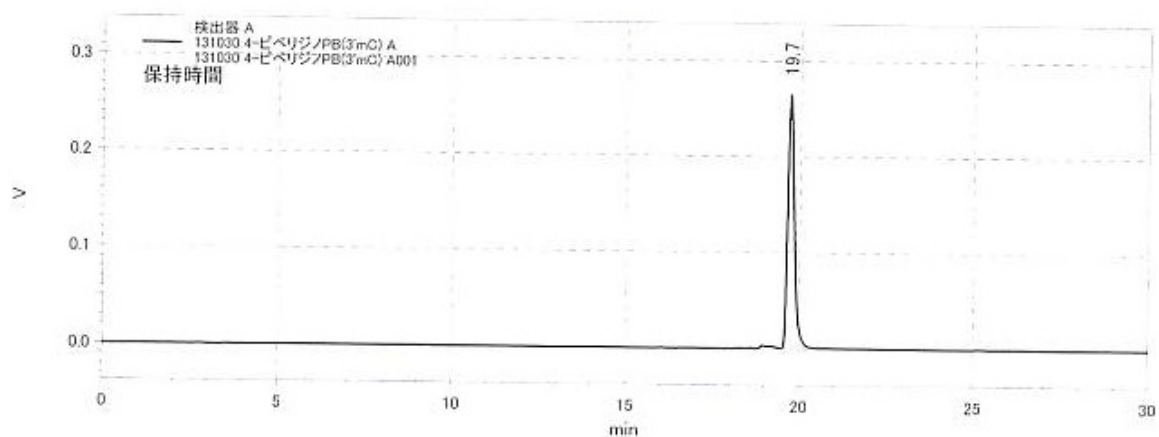

### MALDI-TOF-Mass

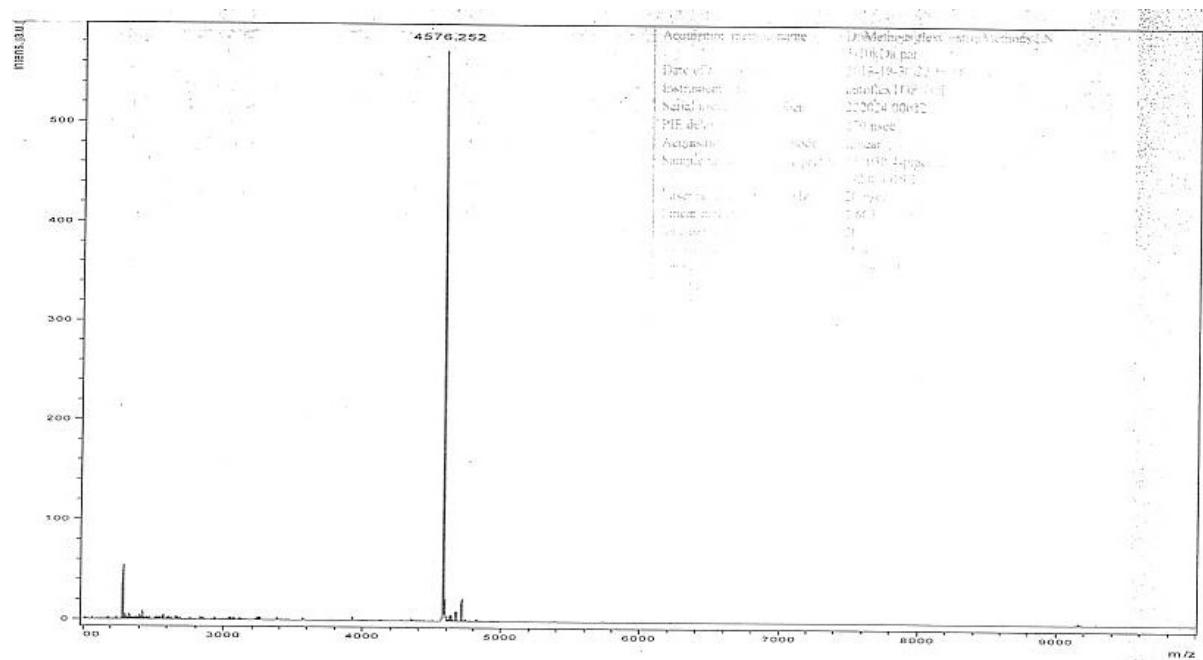

TFO 7e

HPLC

Column : Waters XBridge® MS C<sub>18</sub> 2.5 μm, 4.6 × 50 mm

Gradient : 7–13% MeCN in triethylammonium acetate (0.1 M, pH 7.0) buffer

Flow rate : 1.0 mL/min

Column temp. : 50 °C

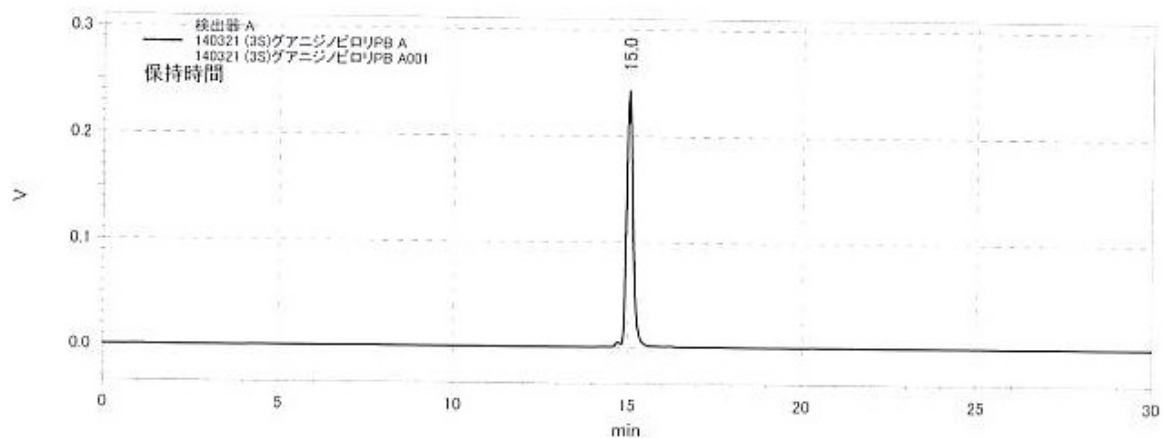

MALDI-TOF-Mass

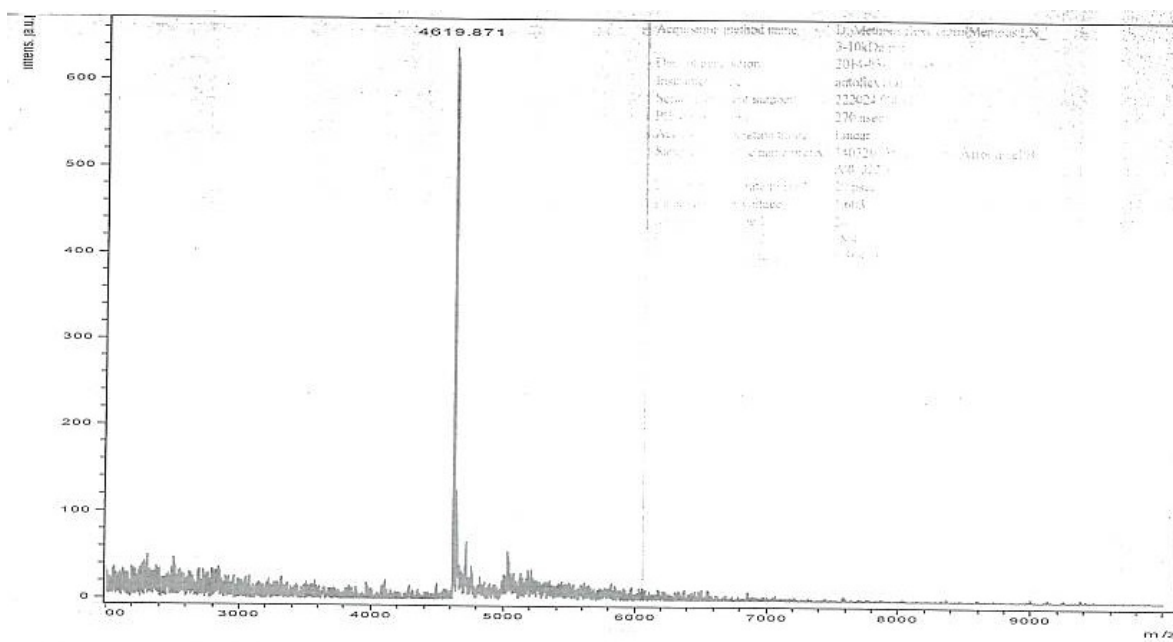



TFO 7g

HPLC

Column : Waters XBridge® MS C<sub>18</sub> 2.5 μm, 4.6 × 50 mm

Gradient : 7–13% MeCN in triethylammonium acetate (0.1 M, pH 7.0) buffer

Flow rate : 1.0 mL/min

Column temp. : 50 °C

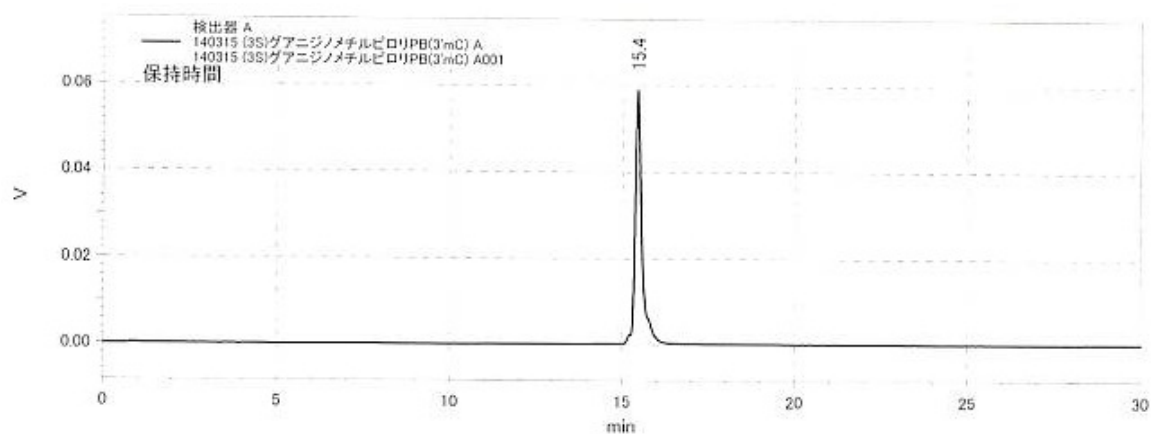

MALDI-TOF-Mass

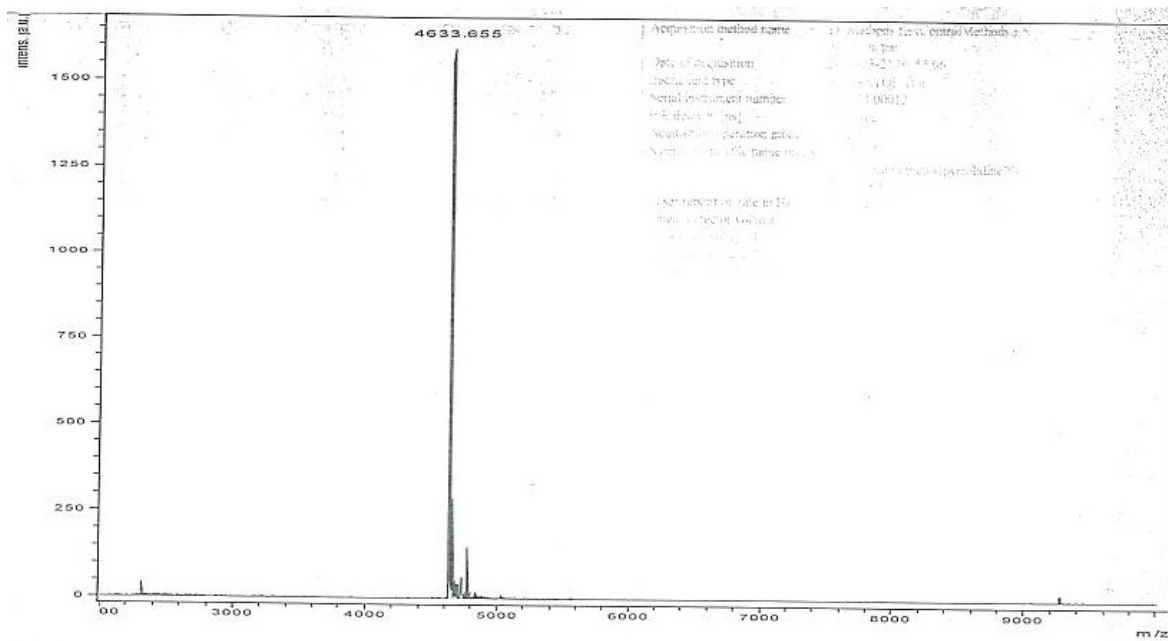

TFO 7h

HPLC

Column : Waters XBridge® MS C<sub>18</sub> 2.5 μm, 4.6 × 50 mm

Gradient : 7–13% MeCN in triethylammonium acetate (0.1 M, pH 7.0) buffer

Flow rate : 1.0 mL/min

Column temp. : 50 °C

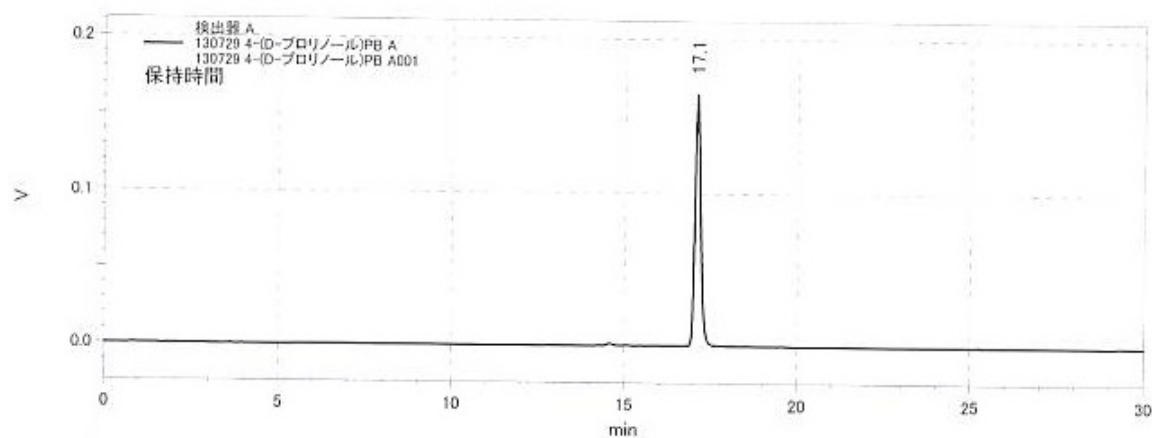

MALDI-TOF-Mass

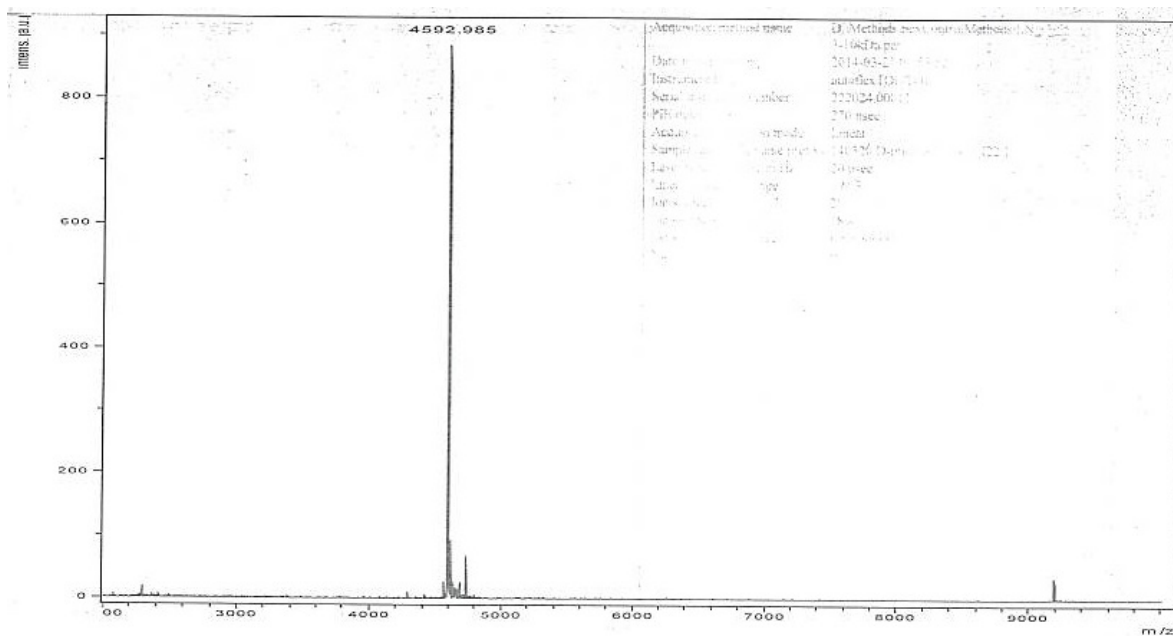

TFO 7i

## HPLC

Column : Waters XBridge® MS C<sub>18</sub> 2.5 µm, 4.6 × 50 mm

Gradient : 7–13% MeCN in triethylammonium acetate (0.1 M, pH 7.0) buffer

Flow rate : 1.0 mL/min

Column temp. : 50 °C

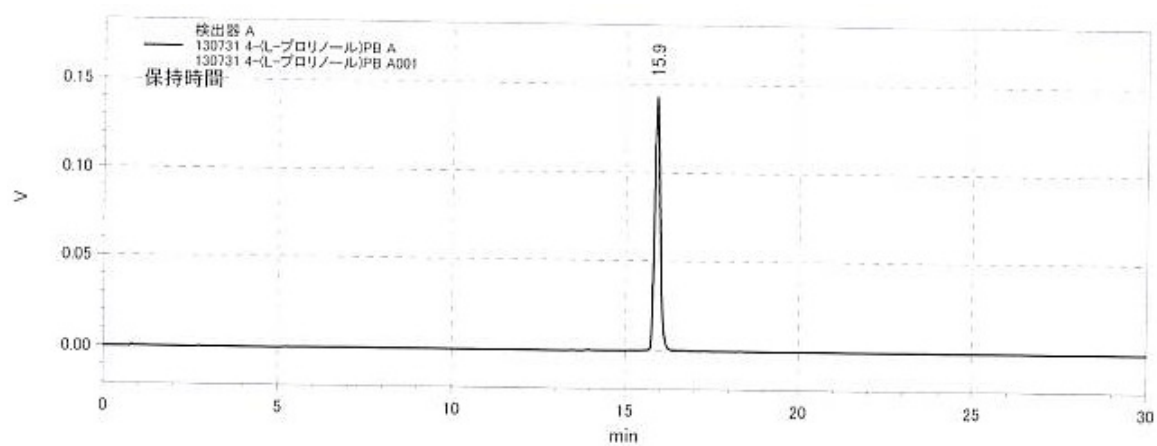

## MALDI-TOF-Mass

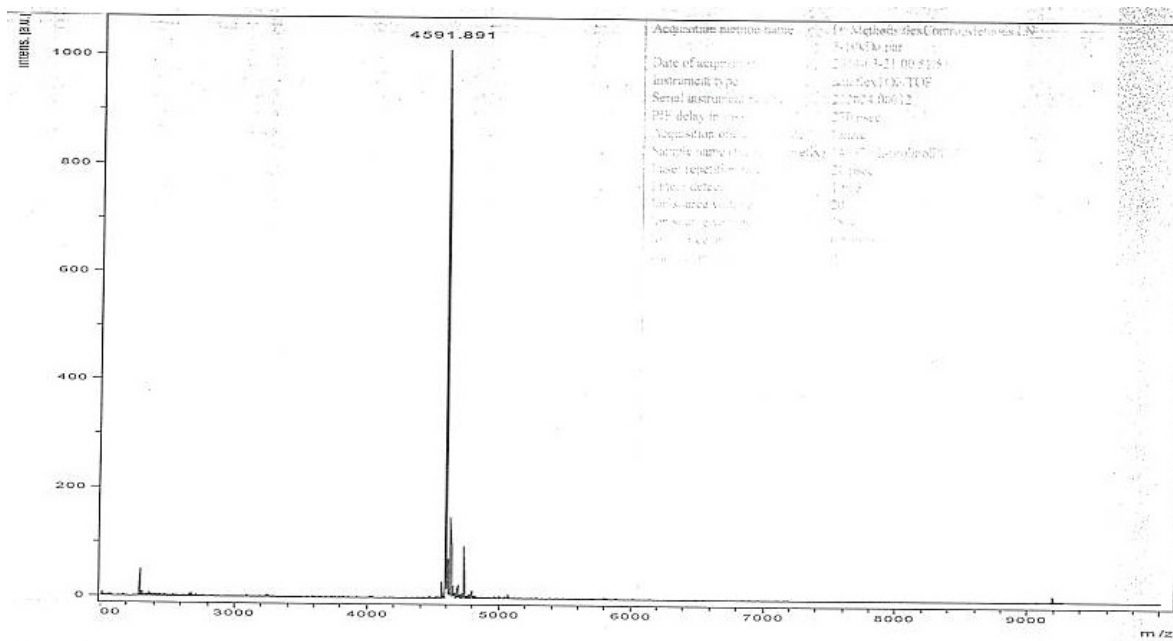

TFO 7j

## HPLC

Column : Waters XBridge® MS C<sub>18</sub> 2.5 μm, 4.6 × 50 mm

Gradient : 7–13% MeCN in triethylammonium acetate (0.1 M, pH 7.0) buffer

Flow rate : 1.0 mL/min

Column temp. : 50 °C

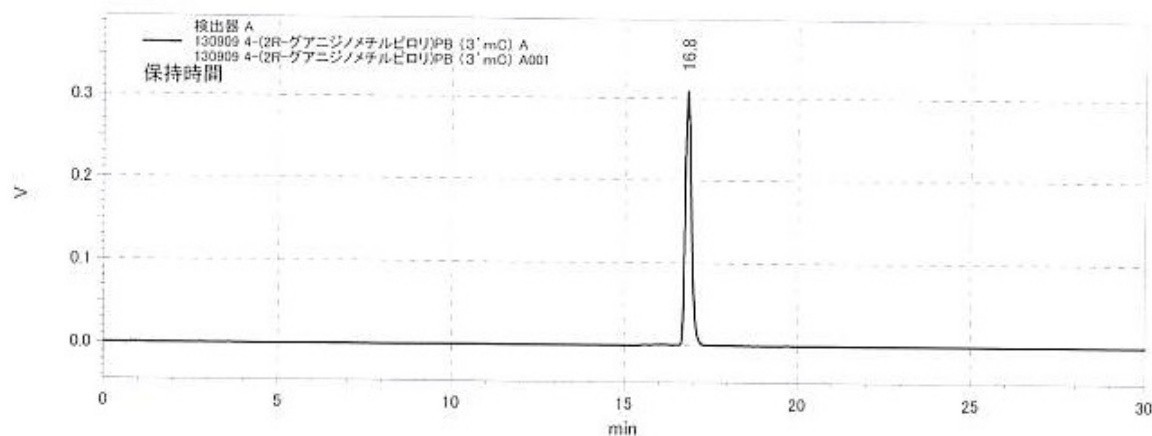

## MALDI-TOF-Mass

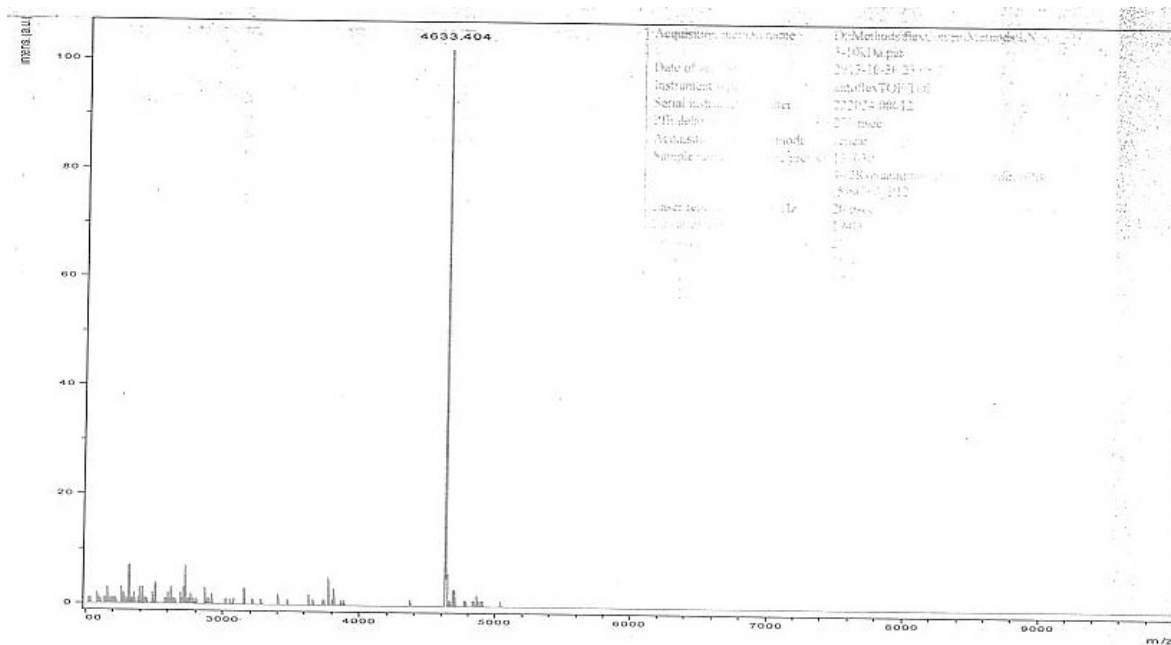

TFO 7k

HPLC

Column : Waters XBridge® MS C<sub>18</sub> 2.5 µm, 4.6 × 50 mm

Gradient : 7–13% MeCN in triethylammonium acetate (0.1 M, pH 7.0) buffer

Flow rate : 1.0 mL/min

Column temp. : 50 °C

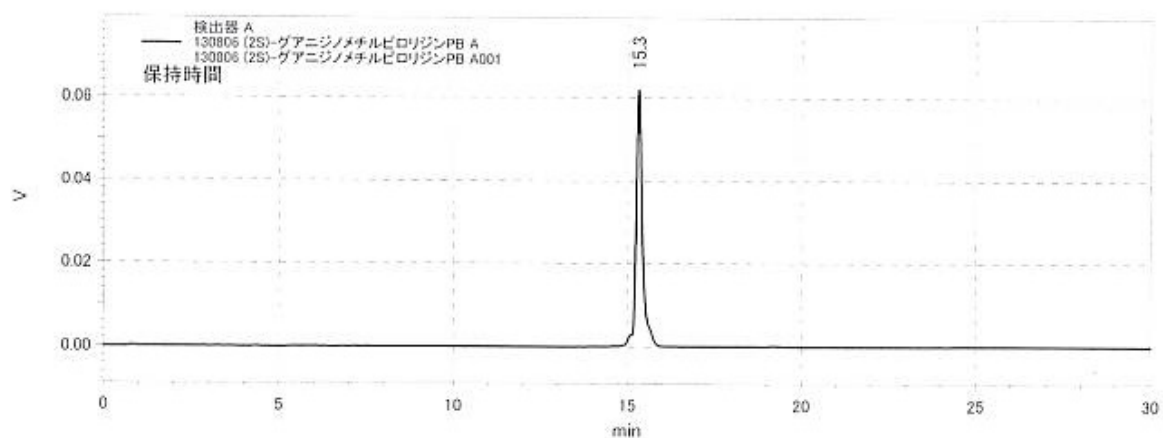

MALDI-TOF-Mass

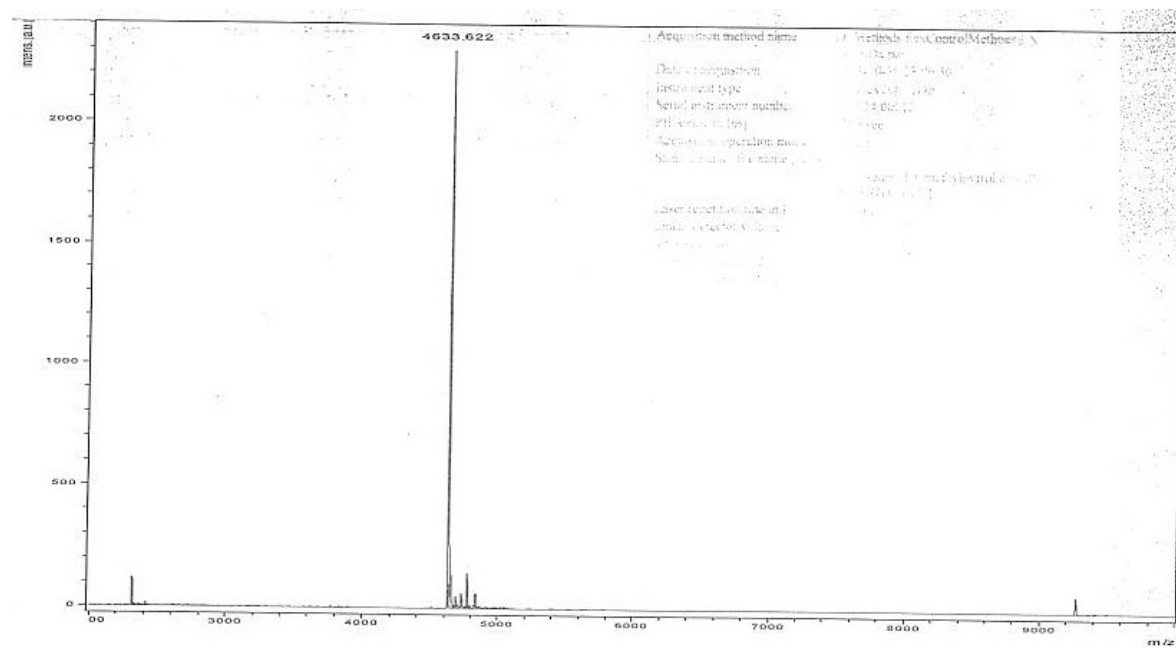

Supplement: c4ob01760a1.pdf [file c4ob01760a1.pdf]
